# Supplementary material for: Rescue of deficits by Brwd1 copy number restoration in the Ts65Dn mouse model of Down syndrome
Source: PubMed Central journal article supplement (PMC9606253; doi:10.1038/s41467-022-34200-0), 2022-10-26
Supplement: 41467_2022_34200_MOESM1_ESM.pdf [file 41467_2022_34200_MOESM1_ESM.pdf]

Supplementary Information for

**Rescue of deficits by *Brwd1* copy number restoration in the Ts65Dn mouse model of Down syndrome**

Sasha L. Fulton<sup>#</sup>, Wendy Wenderski<sup>#</sup>, Ashley E. Lepack<sup>#</sup>, Andrew L. Eagle, Tomas Fanutza, Ryan M. Bastle, Aarthi Ramakrishnan, Emma C. Hays, Arianna Neal, Jaroslav Bendl, Lorna A. Farrelly, Amni Al-Kachak, Yang Lyu, Bulent Cetin, Jennifer C. Chan, Tina N. Tran, Rachael L. Neve, Randall J. Roper, Kristen J. Brennand, Panos Roussos, John C. Schimenti, Allyson K. Friedman, Li Shen, Robert D. Blitzler, Alfred J. Robison, Gerald R. Crabtree, Ian Maze\*

Corresponding author. Email: [ian.maze@mssm.edu](mailto:ian.maze@mssm.edu)

<sup>#</sup>These authors contributed equally to this work

**This file includes:**

Extended Captions for Figures 1 to 4  
Supplementary Figures 1 to 14  
Supplemental Figure 15 (uncropped blots)

**Other Supplementary Material for this manuscript includes the following:**

Description of Additional Supplementary Files  
Supplementary Data 1 to 10

## Extended captions for Figures 1 to 4

### Figure 1. *Brwd1* copy number restoration rescues synaptic and cognitive deficits in male trisomic animals.

(a) qPCR expression data for *Brwd1* in embryonic day (E) 17.5 forebrain (FB;  $n = 11$  euploid vs. 7 Ts65Dn) and adult (6-week) PFC ( $n = 9$  euploid vs. 5 Ts65Dn), hippocampus (HIP;  $n = 9$  euploid vs. 5 Ts65Dn) and cerebellum (CER;  $n = 9$  euploid vs. 5 Ts65Dn) from euploid vs. Ts65Dn male mice. Student's two-tailed t-test [E17.5 FB:  $t_{16} = 2.476$ ,  $*p = 0.0249$ ; PFC:  $t_{12} = 5.912$ ,  $****p < 0.0001$ ; HIP:  $t_{12} = 2.307$ ,  $*p = 0.0397$ ; CER:  $t_{12} = 2.872$ ,  $*p = 0.0140$ ]. (b) Schematic depicting the generation of mouse genotypes to be investigated: euploid vs. *Brwd1*<sup>+/-</sup> vs. Ts65Dn vs. Ts65Dn;*Brwd1*<sup>+/-</sup>. (c) qPCR expression data for *Brwd1* in euploid ( $n = 12$ ) vs. *Brwd1*<sup>+/-</sup> ( $n = 12$ ) vs. Ts65Dn ( $n = 11$ ) vs. Ts65Dn;*Brwd1*<sup>+/-</sup> ( $n = 11$ ) E17.5 forebrain. One-way ANOVA with Tukey's post-hoc analyses [ $F_{3,42} = 30.06$ ,  $p < 0.0001$ ; Tukey's –  $**p < 0.01$ ,  $***p < 0.001$ ,  $****p < 0.0001$ ]. (d) Deficiency of hippocampal LTP in male Ts65Dn mice is rescued by *Brwd1* copy number restoration. Over the final 5 min of recording, LTP was reduced in slices from Ts65Dn mice ( $n = 7$  slices from 3 mice) compared to euploid ( $n = 8$  slices from 3 mice), *Brwd1*<sup>+/-</sup> ( $n = 9$  slices from 3 mice) and Ts65Dn;*Brwd1*<sup>+/-</sup> mice ( $n = 9$  slices from 3 mice), which in turn did not differ from one another. One-way ANOVA [ $F_{3,29} = 8.436$ ,  $p = 0.0003$ ; Tukey's –  $*p < 0.05$ ,  $**p < 0.01$ ,  $***p < 0.001$ ]. The representative traces were recorded at the end of the baseline period (dashed lines) and 60 min after induction of LTP (solid lines). Calibrations: 0.5 mV / 5 ms. (e) Context dependent fear conditioning – displayed as % freezing in the trained context – comparing euploid ( $n = 16$ ) vs. *Brwd1*<sup>+/-</sup> ( $n = 13$ ) vs. Ts65Dn ( $n = 12$ ) vs. Ts65Dn;*Brwd1*<sup>+/-</sup> mice ( $n = 8$ ). One-way ANOVA with Dunnett's post-hoc analyses vs. Ts65Dn [ $F_{3,45} = 3.516$ ,  $p = 0.0225$ ; Dunnett's –  $*p < 0.05$ ]. Data are presented as averages  $\pm$  SEM. Source data are provided as a source data file.



**Figure 2. Rescue of aberrant gene expression in male trisomic brain by *Brwd1* renormalization.**

(a) RNA-seq heatmaps (ordered via unsupervised clustering) of DE genes (FDR<0.1) comparing euploid ( $n = 8$ ) vs. Ts65Dn ( $n = 7$ ) vs. Ts65Dn;*Brwd1*<sup>+/-</sup> ( $n = 8$ ) adult male (6-week) hippocampus. (b) Normalized heatmaps of RNA expression values for DE genes in adult male hippocampus that display pairwise significant regulation between Ts65Dn vs. euploid, and are rescued in Ts65Dn;*Brwd1*<sup>+/-</sup> vs. Ts65Dn. (c) Heatmap displays Jaccard index as well as adjusted p-values from odds ratio analyses of the overlap between DE genes from euploid vs. Ts65Dn vs. Ts65Dn;*Brwd1*<sup>+/-</sup> comparisons and previously published human DS single-nuclei RNA-seq data vs. age-matched controls. (d) Bar graph of  $-\log_{10}(\text{adj. p-val})$  for gene ontology (GO) processes displaying enrichment for PCGs identified in (c) above (i.e., 167 rescued PCGs). Source data are provided as a source data file.

**Figure 3. BRWD1 tightly associates with the BAF complex in euploid brain.**

(a) Schematic of mouse brain soluble nuclear protein extract (NE) preparation, density sedimentation of nuclear proteins over a 10-30% glycerol gradient, and immunoprecipitation of BAF chromatin remodeling complexes. Blue lettering indicates neuronal-specific BAF subunits. Red lettering indicates PBAF-specific subunits. (b) Density sedimentation of adult *Brwd1*<sup>FLAG-HA</sup> brain NE over a 10-30% glycerol gradient indicates that BRWD1 predominantly associates with large protein complexes. Subunits of BAF and AP-1 complexes serve as molecular weight markers: SMARCA2/4 antibody indicates all BAF complexes including non-canonical GBAF (~1 MDa), canonical BAF (~2 MDa) and Polybromo-containing BAF (PBAF, ~3 MDa); ACTL6B and SS18L1 indicate neuronal-specific BAF complexes; c-Jun indicates AP-1 (160-440 kDa). HA signal at the expected molecular weight of BRWD1-FLAG-HA (~260 kDa) is observed in

fractions containing the BAF complex. **(c)** Endogenous BRWD1-FLAG-HA interacts with BAF complexes in embryonic brain. BAF complexes were immunoprecipitated from *Brwd1*<sup>FLAG-HA</sup> brain NE with antibodies against the BAF core ATPase SMARCA4, the neural progenitor subunit SS18, the neuronal subunit SS18L1 or IgG as a control. Endogenous BRWD1-FLAG-HA robustly co-immunoprecipitated with SMARCA4 and the neural progenitor subunit SS18, but less so with the neuronal subunit SS18L1 from E17.5 brain. **(d)** BAF complexes purified from adult *Brwd1*<sup>FLAG-HA</sup> brain NE with antibodies against SMARCA4 or the neuronal subunit SS18L1 co-immunoprecipitate BRWD1-FLAG-HA. Experiments in b-d were repeated at least 2X (technical replicates) with similar results. **(e)** The stability of the BAF:BRWD1-FLAG-HA interaction was challenged with increasing concentrations (0.25-4 M) of the denaturing agent, urea. A fraction of BRWD1 remained bound to BAF in up to 4 M urea, surpassing the stability of the dedicated BAF subunit, SMARCB1. **(f)** Quantification of urea denaturation experiments, as shown in e, with the amount of bound protein normalized to the amount of immunoprecipitated SMARCA4 (n=3 experiments). Data are presented as averages  $\pm$  SEM. Source data are provided as a source data file. See **Supplemental Figure 15** for uncropped blots with MW markers.

**Figure 4. *Brwd1* renormalization partially rescues genomic BAF complex mistargeting in male trisomic brain.**

**(a)** Heatmaps of normalized SMARCA2/4 enrichment in euploid vs. Ts65Dn vs. Ts65Dn;*Brwd1*<sup>+/-</sup> adult male hippocampus (n=4/group) centered (-/+ 5 kb) over sites of differential SMARCA2/4 enrichment comparing Ts65Dn vs. euploid mice (diffReps, p<0.0001). **(b)** Volcano plot depicting regulation of SMARCA2/4 enriched PCGs (3,563) in euploid animals displaying differential enrichment in Ts65Dn mice (2,156/3,563; ~60.5%); gray circles = unregulated PCGs. Of the 2,156 PCGs regulated with respect to SMARCA2/4 enrichment, 595 are rescued (red circles; ~27.6%)

in Ts65Dn;*Brwd1*<sup>+/-</sup> mice, whereas the remainder of PCGs do not display such rescue (black circles). Note that many PCGs are assigned multiple Log2FCs and p-values in diffReps analyses. Therefore, for each PCG, we plotted the Log2FC (and respective p-value) for the most significant p-value/PCG. **(c)** Relative frequency (observed/expected overlap in base pairs) of each chromatin state within significant differentially enriched sites for SMARCA2/4 (Ts65Dn vs. euploid). Chromatin states were obtained from brain regions included in the Roadmap Epigenomics Project. **(d)** Bubble plots of GO processes (burgundy) and KEGG pathways (purple) displaying enrichment for rescued differentially enriched PCGs identified in (b) above (i.e., 595 rescued PCGs). **(e)** Odds ratio analysis of overlapping differentially accessible sites in Ts65Dn vs. euploid animals and Ts65Dn;*Brwd1*<sup>+/-</sup> animals, separated by direction of regulation. **(f)** Odds ratio analysis of overlapping PCGs displaying rescued differential SMARCA2/4 enrichment in Ts65Dn vs. euploid animals (595 from B above) vs. PCGs displaying differential chromatin accessibility (neuronal ATAC-seq, *n*=3/group, diffReps, *p*<0.0001) in Ts65Dn vs. euploid mice that are either rescued, or not, in their differential accessibility in Ts65Dn;*Brwd1*<sup>+/-</sup> animals. Insert numbers indicate respective p values for associations, followed by the number of PCGs overlapping per category. Source data are provided as a source data file.

## Supplementary Figures 1 to 14

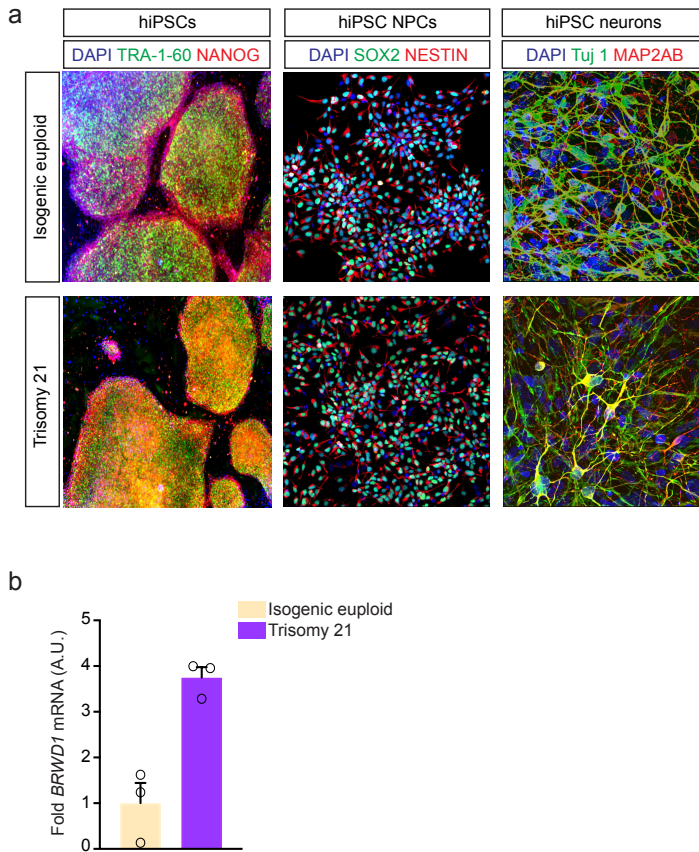

### Supplementary Figure 1. *BRWD1* is overexpressed in human Trisomy 21 neurons.

**(a)** Trisomy 21 patient-specific hiPSCs, NPCs and neurons vs. those from an isogenic euploid control. Left-hiPSCs express NANOG (red) and TRA-1-60 (green). DAPI (blue). Center-hiPSC neural progenitor cells (NPCs) express NESTIN (red) and SOX2 (green). DAPI (blue). Right-hiPSC neurons express Tuj 1 (green) and the dendritic marker MAP2AB (red). DAPI (blue). Experiment repeated 3 times. **(b)** qPCR expression data for *BRWD1* in hiPSC neurons derived from a single patient with Trisomy 21 vs. an isogenic control. Samples were run in technical (by plate) triplicates and are thus quantified but not statistically compared. Data are presented as averages  $\pm$  SEM. Source data are provided as a source data file.

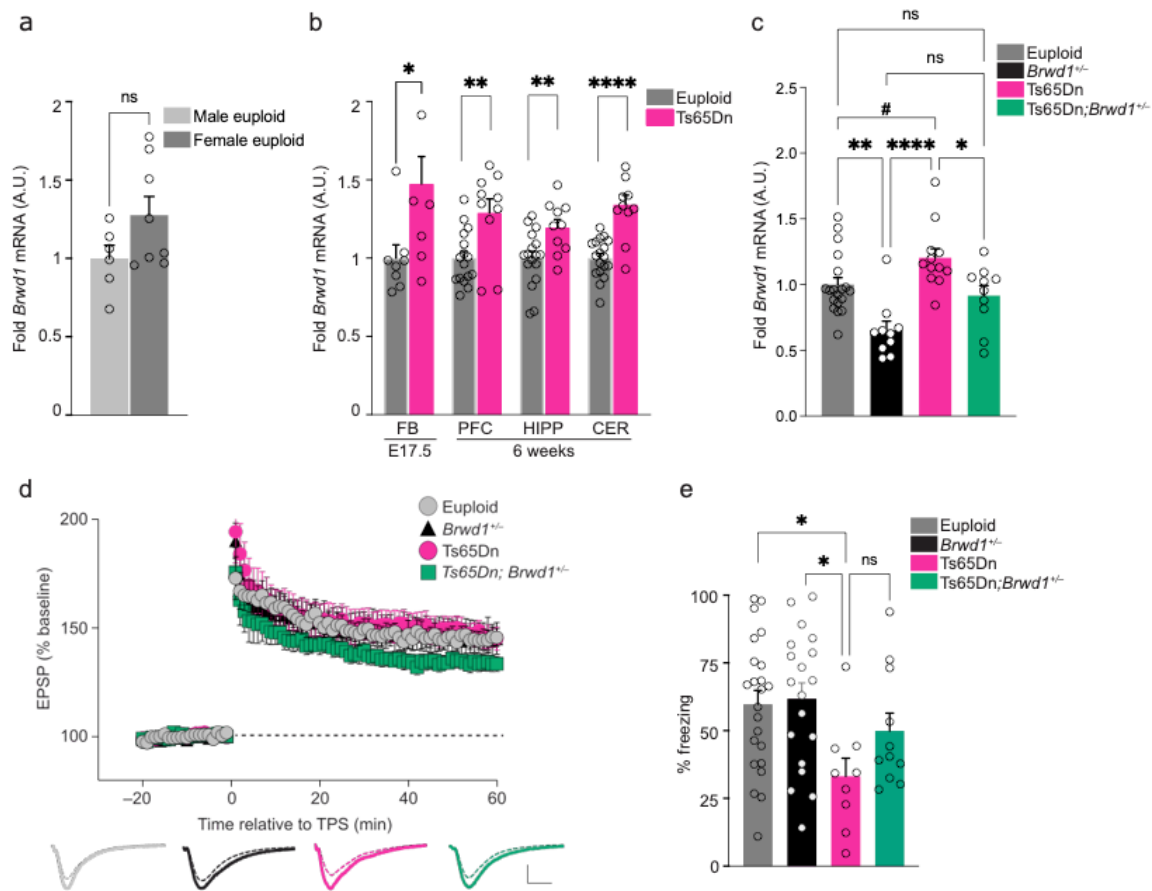

**Supplementary Figure 2. Female Ts65Dn mice show distinct physiological and *Brwd1* expression phenotypes vs. male Ts65Dn with more modest involvement of *Brwd1*.**

(a) qPCR expression data for *Brwd1* in male vs. female euploid adult hippocampus ( $n = 6$  male vs. 8 female). (b) qPCR expression data for *Brwd1* in embryonic day (E) 17.5 forebrain (FB;  $n = 17$  euploid vs. 10 Ts65Dn) and adult (6-week) PFC ( $n = 10$  euploid vs. 18 Ts65Dn), hippocampus (HIPP;  $n = 10$  euploid vs. 17 Ts65Dn) and cerebellum (CER;  $n = 18$  euploid vs. 10 Ts65Dn) from euploid vs. Ts65Dn female mice. Student's t-test [E17.5 FB:  $t_{14} = 2.453$ ,  $*p = 0.0279$ ; PFC:  $t_{24} = 3.269$ ,  $** = 0.0032$ ; HIPP:  $t_{25} = 2.82$ ,  $** = 0.0093$ ; CER:  $t_{26} = 5.713$ ,  $**** < 0.0001$ ]. (c) qPCR expression data for *Brwd1* in euploid ( $n = 19$ ) vs. *Brwd1*<sup>+/-</sup> ( $n = 10$ ) vs. Ts65Dn ( $n = 12$ ) vs. Ts65Dn;*Brwd1*<sup>+/-</sup> ( $n = 10$ ) in adult (6wk) female hippocampus. One-way ANOVA with Tukey's post-hoc analyses [ $F_{3,47} = 10.55$ ,  $p < 0.0001$ ; Tukey's - # $p = 0.0669$ ,  $*p = 0.0287$ ,  $**p = 0.0021$ ,

\*\*\*\* $p < 0.0001$ ]. **(d)** In females, LTP in *Ts65Dn* mice ( $n = 8$  slices from 3 mice) did not differ from that of euploid controls ( $n = 8$  slices from 3 mice);  $p > 0.9$  for each of the final 5 time points. Similarly, no significant differences were found between either of these genotypes and the *Brwd1*<sup>+/-</sup> ( $n = 9$  slices from 3 mice) or *Ts65Dn;Brwd1*<sup>+/-</sup> mice ( $n = 9$  slices from 3 mice); all  $p$ 's  $> 0.14$  (two-way RM ANOVA with Tukey's post-hoc analyses). Representative traces for each genotype were obtained at the end of the baseline period (dashed lines) and 60 min after induction of LTP (solid lines). Calibrations: 0.5 mV / 5 ms. **(e)** Conditioned fear responses (displayed as % freezing within the trained context) in euploid ( $n = 23$ ) vs. *Brwd1*<sup>+/-</sup> ( $n = 19$ ) vs. *Ts65Dn* ( $n = 9$ ) vs. *Ts65Dn;Brwd1*<sup>+/-</sup> ( $n = 11$ ) female mice. One-way ANOVA [ $F_{3,58} = 3.559$ ,  $p = 0.0196$ ] with Dunnett's post-hoc analyses (vs. *Ts65Dn*); *Ts65Dn* vs. WT: \* $p = 0.0148$ , *Ts65Dn* vs. *Brwd1*<sup>+/-</sup>: \* $p = 0.0105$ , *Ts65Dn* vs. *Ts65Dn;Brwd1*<sup>+/-</sup>: ns = 0.2511. Data are presented as averages  $\pm$  SEM. Source data are provided as a source data file.

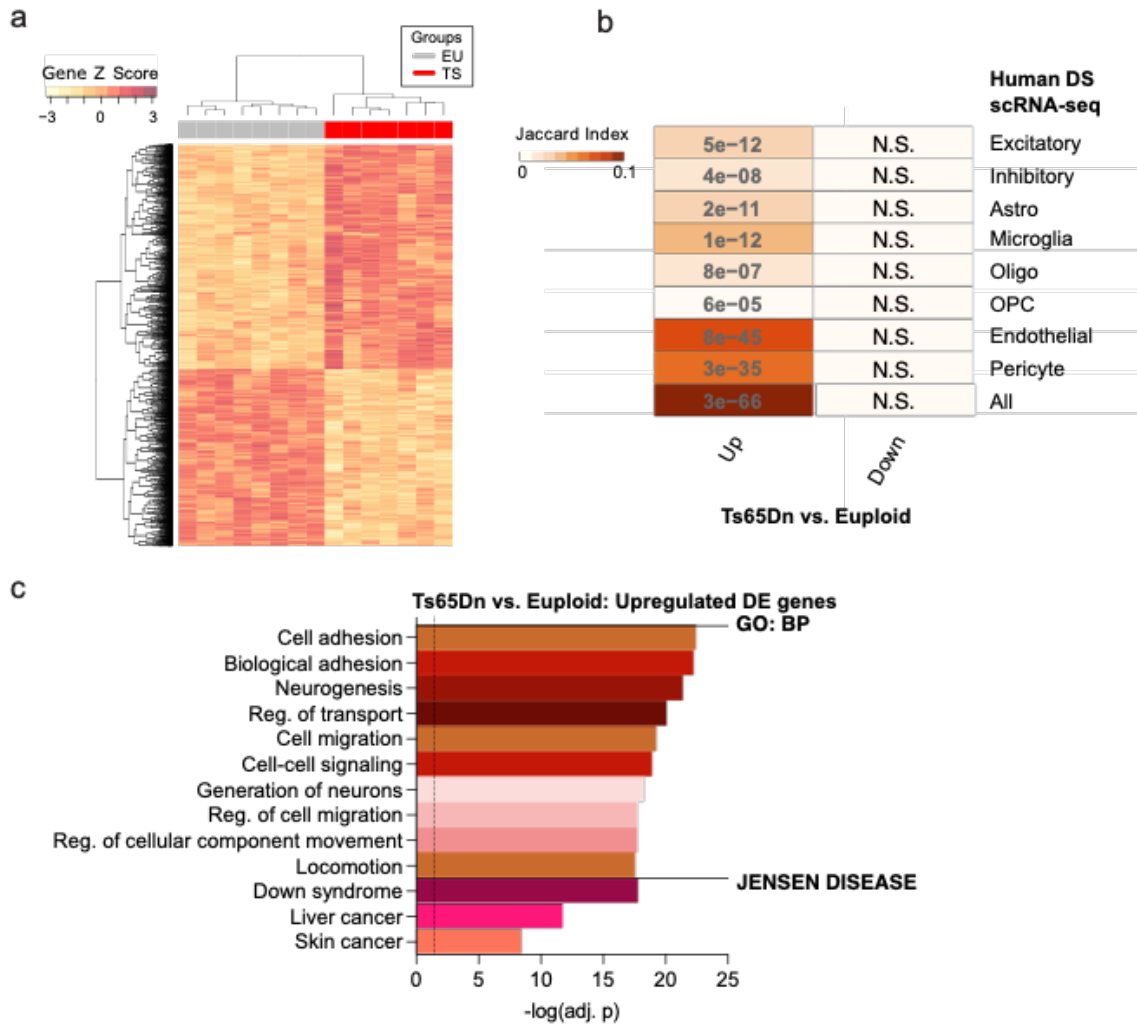

**Supplementary Figure 3. Gene expression changes in embryonic E17.5 Ts65Dn forebrain significantly overlap with human DS.**

(a) RNA-seq heatmaps of DE genes (FDR <.1) between e17.5 Ts65Dn ( $n = 7$ ) vs. euploid ( $n = 8$ ) forebrain tissue. Normalized RNA expression values (averaged between replicates) were used to generate z-scores for each row. (b) Odds ratio analyses showing significant overlap between DE genes in (a) and human DS RNA-seq profiles. (c) Bar graphs of  $-\log_{10}(\text{adj. p-val})$  for gene ontology (GO) processes and Jensen disease pathways displaying enrichment for DE genes identified in (a). Source data are provided as a source data file.

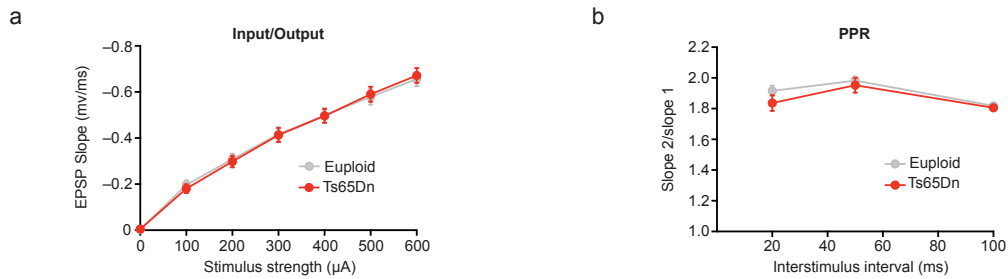

**Supplementary Figure 4. Rescue of neuronal physiology deficits by *Brwd1* copy number restoration are specific to LTP.**

**(a)** Basal synaptic efficiency at Schaffer collateral inputs to area CA1, as assessed by the input-output relationship, was not affected in Ts65Dn mice ( $n = 8$  slices from 2 male mice) compared to euploid controls ( $n = 6$  slices from 2 male mice); two-way RM ANOVA, effect of genotype –  $p = 0.98$ . **(b)** Paired-pulse ratio, assessed at intervals from 20 to 100 ms, did not differ between Ts65Dn mice ( $n = 8$  slices from 2 male mice) and euploid controls ( $n = 6$  slices from 2 male mice); two-way RM ANOVA, effect of genotype –  $p = 0.38$ . Data are presented as averages  $\pm$  SEM. Source data are provided as a source data file.



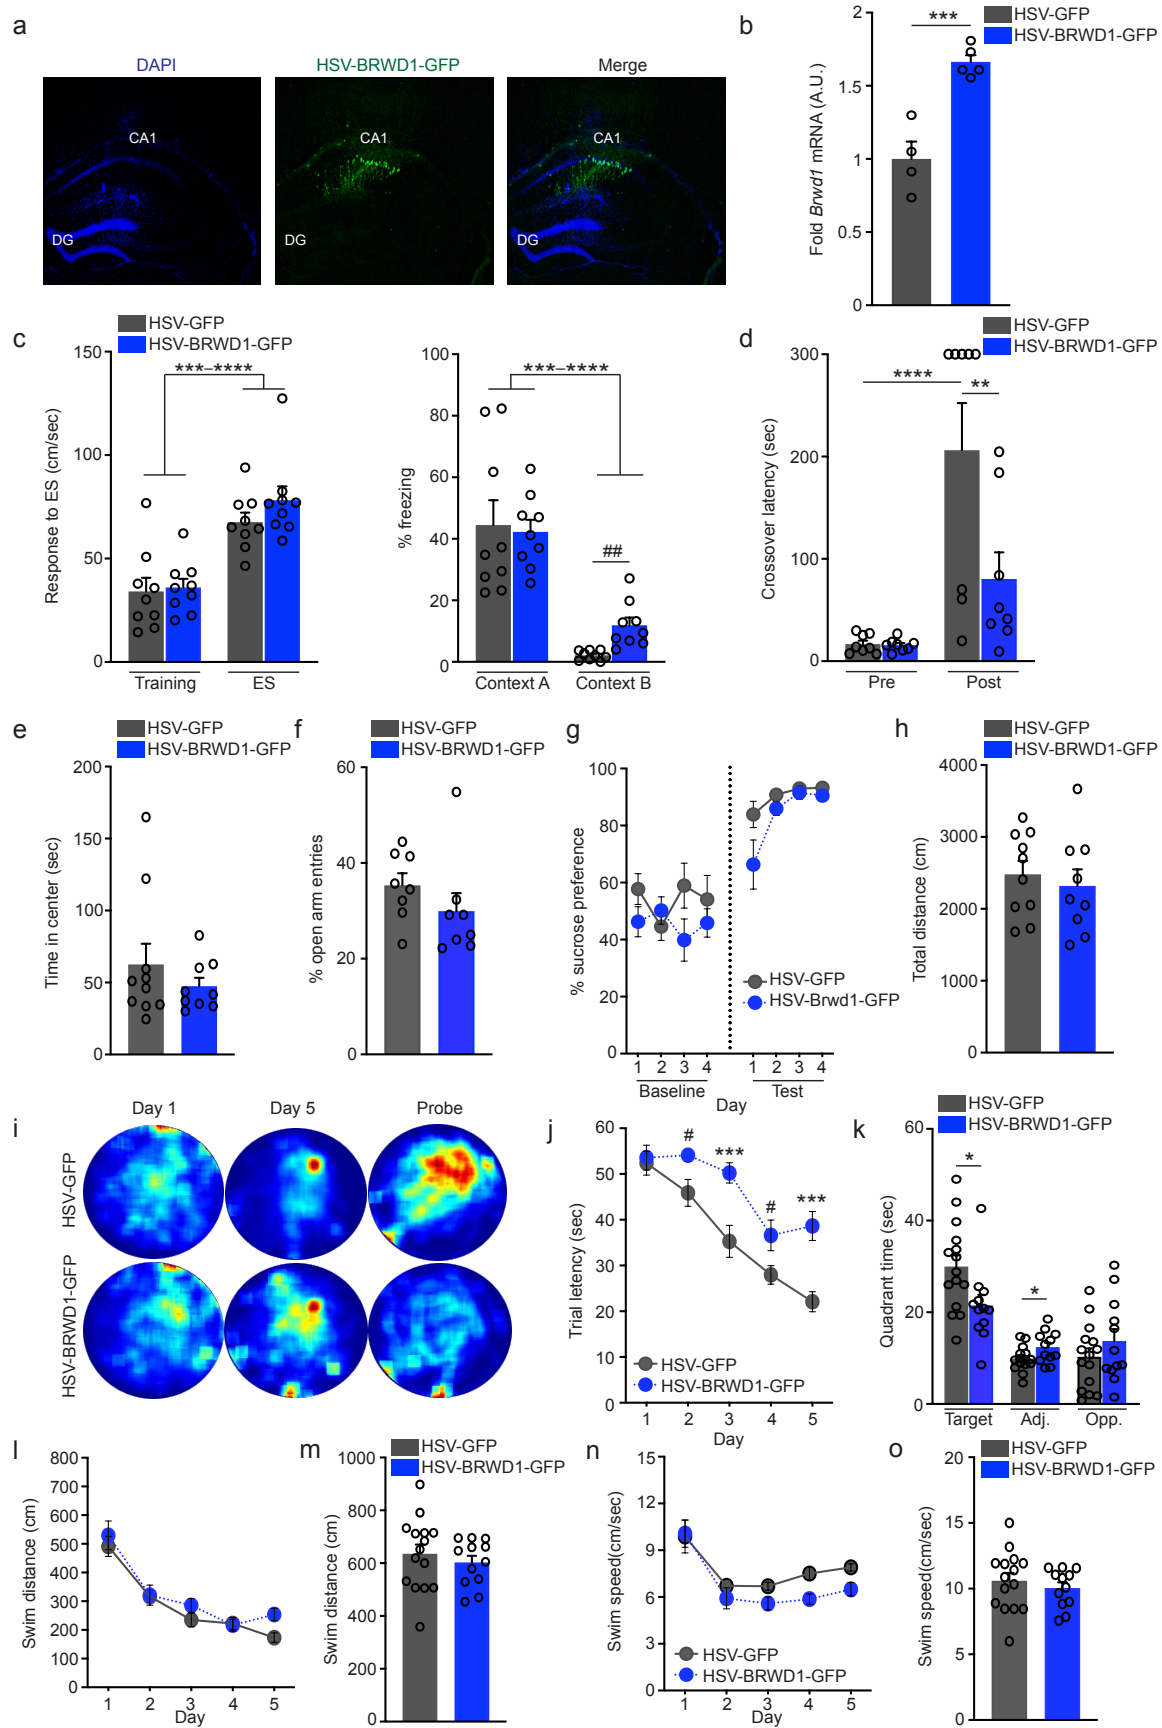

**Supplementary Figure 5. *Brwd1* overexpression in adult male hippocampus is sufficient to induce cognitive deficits.**

(a) Immunofluorescence images of mouse dorsal hippocampus (CA1) transduced with an HSV vector expressing BRWD1<sup>FLAG-HA</sup>-GFP overlaid with a nuclear co-stain (DAPI) at 20x objective. DG = dentate gyrus. (b) qPCR expression data for *Brwd1* in CA1 transduced with HSV-BRWD1-GFP ( $n = 5$ ) vs. HSV-GFP ( $n = 4$ ). Student's unpaired t-test [ $t_7 = 5.670$ ,  $***p = 0.0008$ ]. (c) Context dependent fear conditioning. *Left* – training vs. response to electric shock (ES) in context A; two-way ANOVA with Sidak's post-hoc analyses: effect of ES [ $F_{1,32} = 45.60$ ,  $p < 0.0001$ ; Sidak's – GFP ( $***p = 0.004$ ), BRWD1-GFP ( $****p < 0.0001$ )]; effect of virus [ $F_{1,32} = 1.252$ ,  $p = 0.27$ ]. *Right* – fear conditioned responses in context A vs. B (displayed as % freezing); two-way ANOVA with Sidak's post-hoc analyses: effect of context [ $F_{1,32} = 60.73$ ,  $p < 0.0001$ ; Sidak's – GFP ( $****p < 0.0001$ ), BRWD1-GFP ( $***p = 0.0004$ )]. *a posteriori* Student's t-tests comparing HSV-BRWD1-GFP vs. HSV-GFP in contexts A and B were performed – context B ( $t_{16} = 3.861$ ,  $##p = 0.0014$ ). No differences were observed in the conditioned context A.  $n = 9$ /viral group. (d) TDPA – two-way ANOVA with Sidak's post-hoc analyses: effect of training (pre/post) [ $F_{1,28} = 23.03$ ,  $p < 0.0001$ ; Sidak's – GFP ( $****p < 0.0001$ ), BRWD1-GFP ( $p = 0.18$ )]; effect of virus [ $F_{1,28} = 5.752$ ,  $p = 0.02$ ; Sidak's – pre BRWD1-GFP vs. GFP ( $p = 0.9995$ ), post BRWD1-GFP vs. GFP ( $**p = 0.0045$ )]  $n = 8$ /viral group. (e) Open field test (time in center) – student's unpaired t-test ( $p = 0.36$ ).  $n = 10$  GFP vs. 9 BRWD1. (f) EPM (% open arm entries) – student's unpaired t-test ( $p = 0.25$ ).  $n = 8$ /viral group. (g) Sucrose preference (displayed as % preference over days) – analyzed as total preference baseline vs. test; two-way ANOVA with Sidak's post-hoc analyses [Sidak's – baseline BRWD1-GFP vs. GFP ( $p = 0.06$ ), test BRWD1-GFP vs. GFP ( $p = 0.17$ )].  $n = 8$ /viral group. (h) Locomotion (total distance) – student's unpaired t-test ( $p = 0.58$ ).  $n = 10$  GFP vs. 9 BRWD1. (i) MWM – representative heatmaps of movement in the maze on days 1 and 5 of

training, as well as during the probe test for both viral groups. **(j)** MWM training (trial latency to locate the platform), days 1-5. Two-way RM ANOVA with Sidak's post-hoc analyses: effects of day [ $F_{4,125} = 28.21$ ,  $p < 0.0001$ ] and virus [ $F_{4,125} = 33.49$ ,  $p < 0.0001$ ]; Sidak's BRWD1-GFP vs. GFP – day 3 (\*\* $p = 0.0008$ ), day 5 (\*\* $p = 0.0002$ ). *a posteriori* student's t-tests – days 2 and 4 ( $\#p < 0.05$ ).  $n = 15$  GFP vs. 12 BRWD1. **(k)** MWM probe test (quadrant time; target vs. adjacent/Adj. vs. opposite/Opp.) – student's t-tests: target ( $t_{25} = 2.427$ ,  $*p = 0.02$ ), Adj. ( $t_{25} = 2.152$ ,  $*p = 0.04$ ), Opp. ( $t_{25} = 1.110$ ,  $p = 0.28$ ).  $n = 15$  GFP vs. 12 BRWD1. **(l-o)** Swim distance during training **(l)** and during the probe test **(m)**, as well as swim speed during training **(n)** and during the probe test **(o)** were unaffected ( $p > 0.05$  for all comparisons) by viral transduction with BRWD1-GFP; assessed via two-way RM ANOVA (Sidak's post-hoc) and student's t-tests for L/N and M/O, respectively.  $n = 15$  GFP vs. 12 BRWD1. All viral manipulation experiments were performed in male mice. Data are presented as averages  $\pm$  SEM. Source data are provided as a source data file.

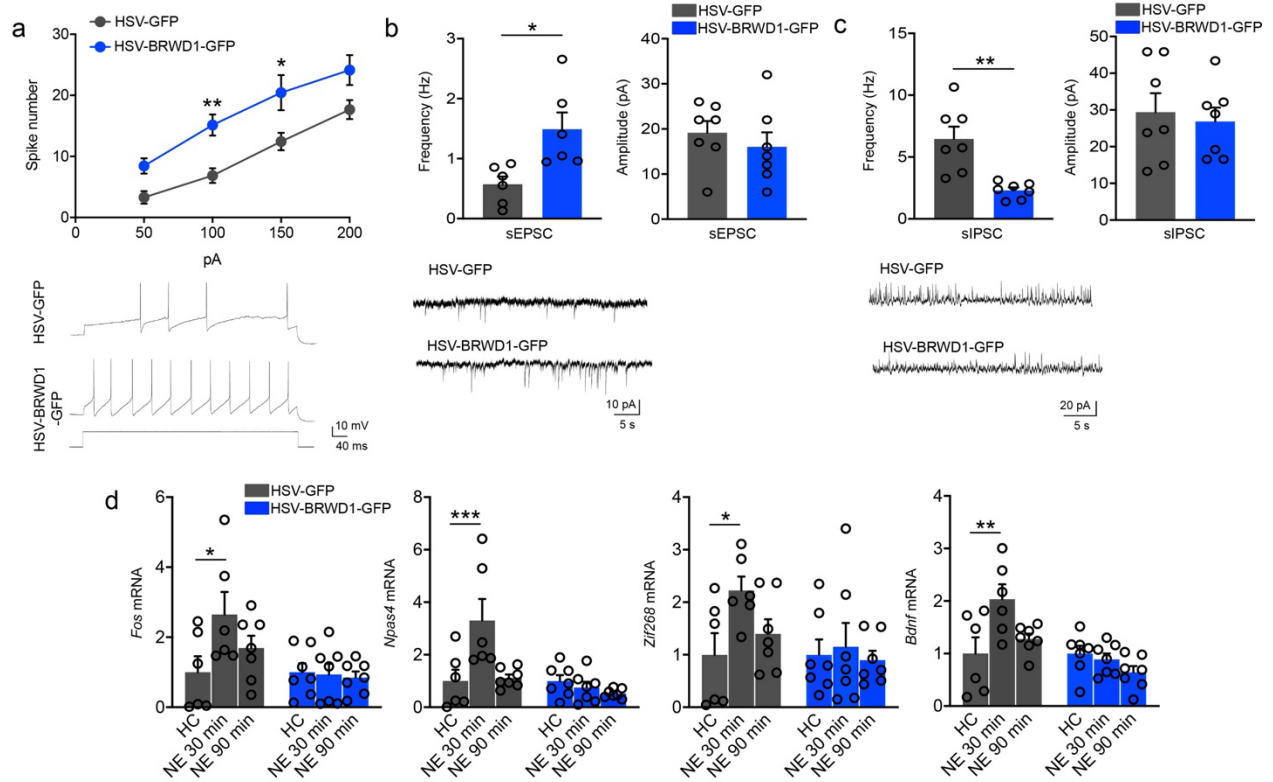

**Supplementary Figure 6. *Brwd1* overexpression in adult male hippocampus inhibits transcriptional plasticity via potentiation of excitation/inhibition imbalance.**

(a) Quantification of current-induced spike number in HSV-GFP vs. HSV-BRWD1-GFP expressing CA1 pyramidal neurons indicating that *Brwd1* overexpression results in increased cellular excitability ( $n = 7$  neurons from 3 mice/group). Student's unpaired t-test [100 pA:  $t_{12} = 3.940$ ,  $**p = 0.0020$ ; 150 pA:  $t_{12} = 2.490$ ,  $*p = 0.0284$ ]. Representative traces are provided (the bottom trace indicates the injection of 100 pA depolarizing current). (b-c) Representative traces and quantification of (b) sEPSC and (c) sIPSC frequencies (left) and amplitudes (right) from adult hippocampal CA1 pyramidal neurons transduced with HSV-GFP vs. HSV-BRWD1-GFP ( $n = 7$  neurons from 3 mice/group). Student's unpaired t-test [sEPSC frequency:  $t_{10} = 2.988$ ,  $*p = 0.0136$ ; sIPSC frequency:  $t_{12} = 4.058$ ,  $**p = 0.0016$ ]. (d) qPCR expression data for IEGs in CA1 transduced with HSV-BRWD1-GFP ( $n = 7$ /condition) vs. HSV-GFP ( $n = 6$  for home cage and 30 min,  $n = 7$

for 90 min); data are normalized to respective HC controls within each viral group. Two-way ANOVA with Dunnett's post-hoc analyses [*Fos*: effect of virus,  $F_{1,34} = 7.705$ ,  $p=0.0089$ , Dunnett's – \* $p=0.0108$ ; *Npas4*: effect of virus,  $F_{1,34} = 11.90$ ,  $p=0.0015$ , effect of novel environment (NE),  $F_{2,34} = 6.118$ ,  $p=0.0054$ , interaction,  $F_{2,34} = 6.344$ ,  $p=0.0046$ , Dunnett's – \*\*\* $p=0.0004$ ; *Zif268*: effect of virus,  $F_{1,34} = 3.901$ ,  $p=0.0564$ , Dunnett's – \* $p=0.0295$ ; *Bdnf*: effect of virus,  $F_{1,34} = 15.58$ ,  $p=0.0004$ , effect of NE,  $F_{2,34} = 4.543$ ,  $p=0.0178$ , interaction,  $F_{2,34} = 4.723$ ,  $p=0.0155$ , Dunnett's – \*\* $p=0.0012$ . Data are presented as averages  $\pm$  SEM. Source data are provided as a source data file.

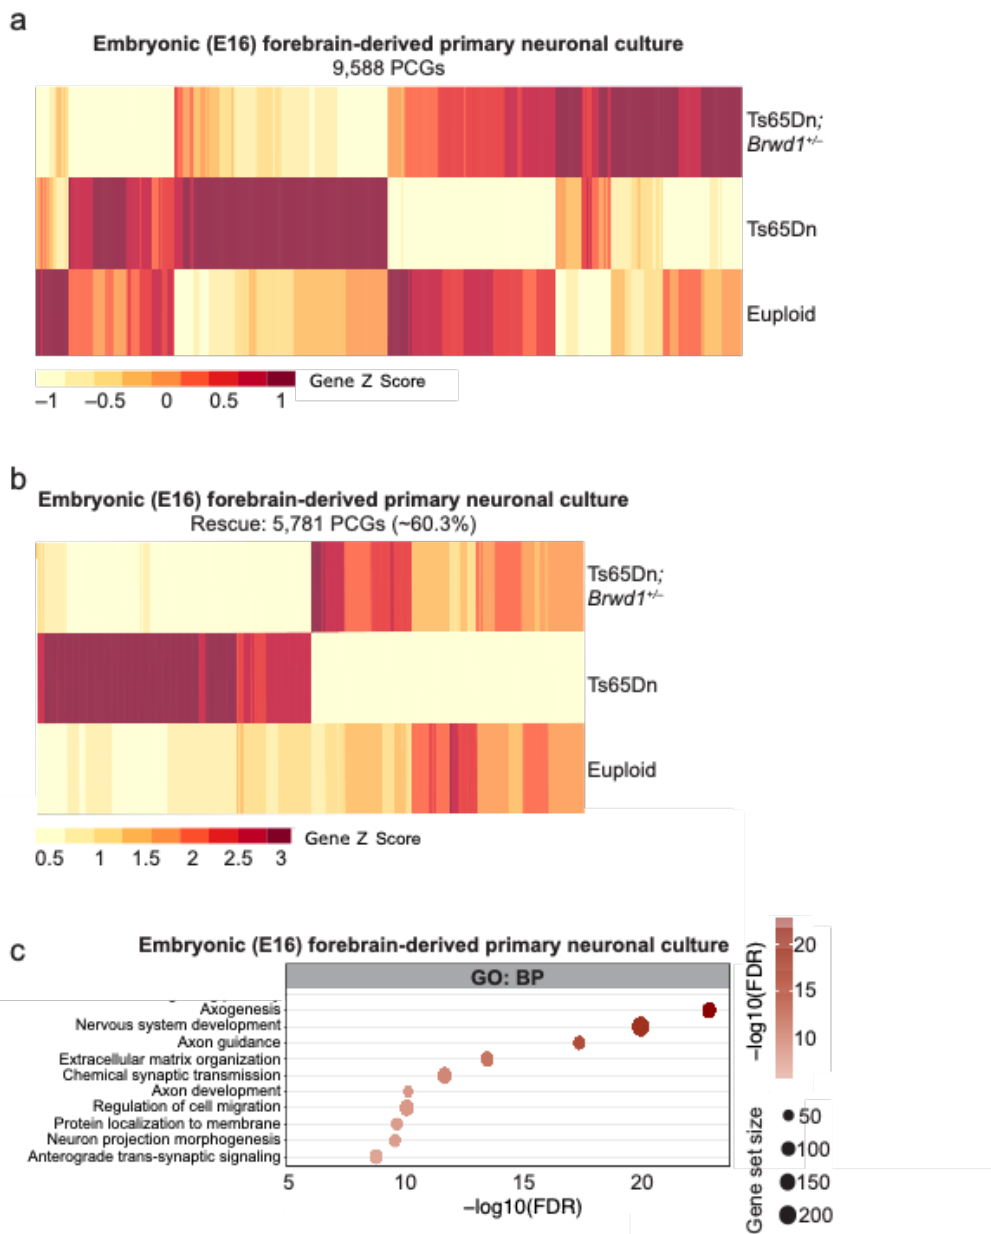

**Supplementary Figure 7. Rescue of aberrant gene expression in trisomic embryonic forebrain-derived neurons by *Brwd1* renormalization.**

(a) RNA-seq heatmaps of DESeq2 (likelihood-ratio-test) significant PCGs comparing euploid vs. Ts65Dn vs. Ts65Dn;*Brwd1*<sup>+/-</sup> E16 forebrain-derived primary neuronal cultures (mixed male and female,  $n = 3/\text{group}$ ). (b) RNA-seq heatmaps of DESeq2 significant PCGs in E16 forebrain-derived primary neuronal cultures that display pairwise significant regulation between Ts65Dn vs.

euploid, along with pairwise significant rescue in Ts65Dn;*Brwd1*<sup>+/-</sup> vs. Ts65Dn. **(c)** Bubble plot of gene ontology (GO) processes displaying enrichment for PCGs identified in (b) above. Source data are provided as a source data file.

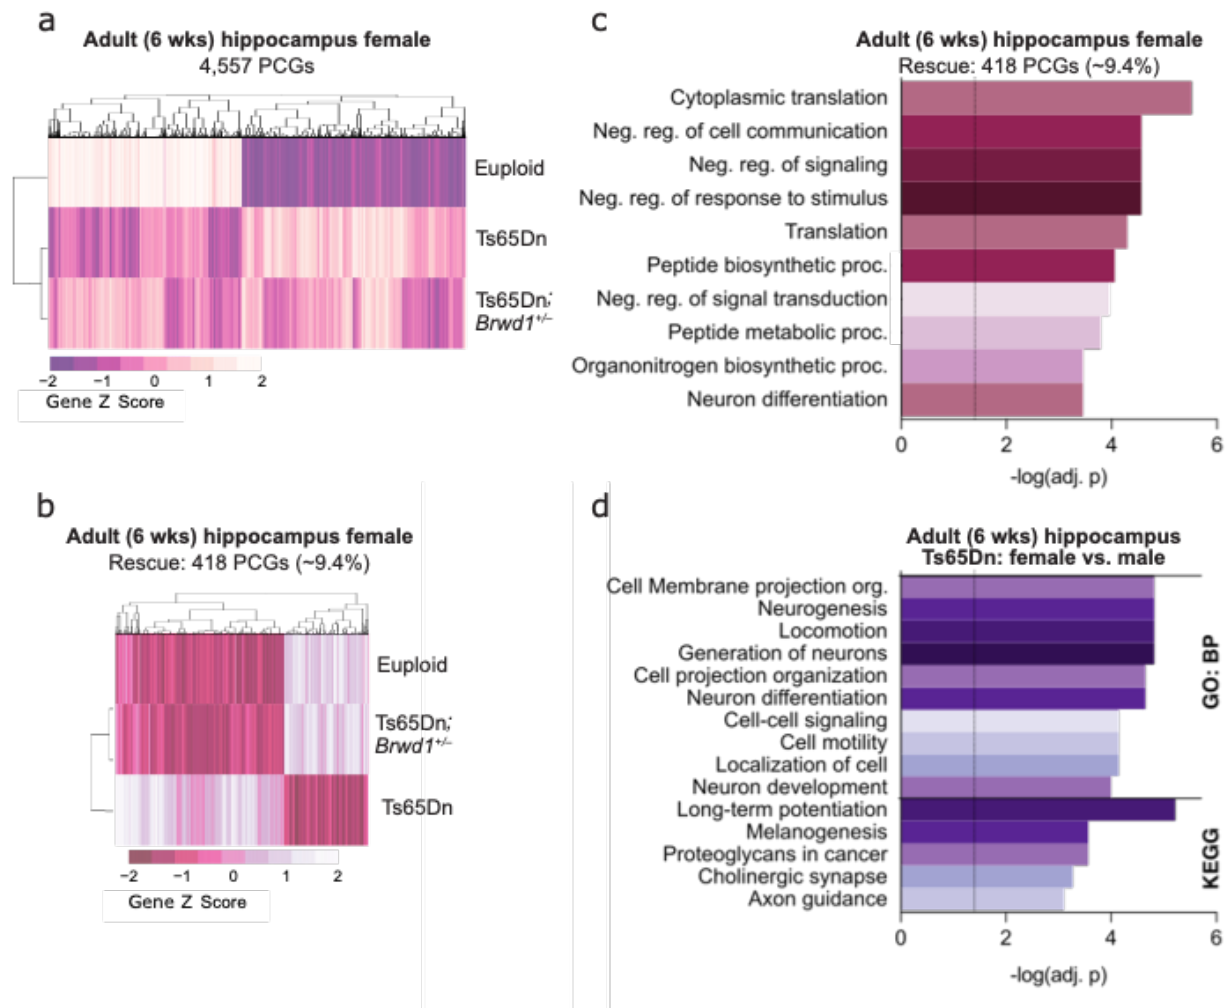

**Supplementary Figure 8. RNA-seq in female Ts65Dn vs. euploid vs. Ts65Dn;*Brwd1*<sup>+/-</sup> mice reveals modest rescue of gene expression changes.**

**(a)** RNA-seq heatmaps of DE genes (FDR <.1) by pairwise comparison of female euploid vs. Ts65Dn vs. Ts65Dn;*Brwd1*<sup>+/-</sup> adult (6-week) hippocampus ( $n = 8$ /group). Normalized RNA expression values (averaged between replicates) were used to generate z-scores for each row. **(b)** Normalized heatmaps of RNA expression values for DE genes in adult female hippocampus that display pairwise significant regulation between Ts65Dn vs. euploid, and are rescued in Ts65Dn;*Brwd1*<sup>+/-</sup> vs. Ts65Dn. **(c)** Bar graph of  $-\log_{10}(\text{adj. p-val})$  for gene ontology (GO) processes displaying enrichment for PCGs identified in (c) above. **(d)** Bar graph of  $-\log_{10}(\text{adj. p-}$



val) for gene ontology (GO) processes and KEGG pathways displaying enrichment for DE genes identified in between Ts65Dn female vs. Ts65Dn male mice. Source data are provided as a source data file.

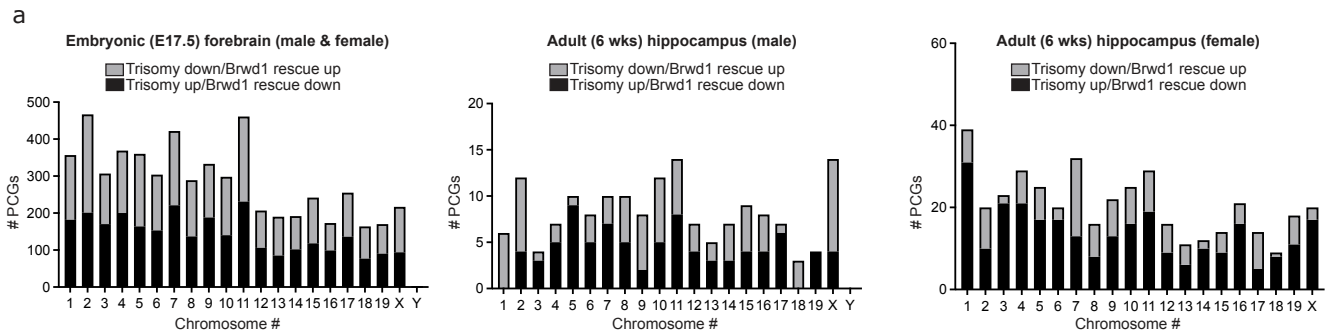

**Supplementary Figure 9. Rescue of aberrant gene expression in trisomic hippocampus by *Brwd1* copy number restoration.**

(a) Chromosomal enrichment of differentially expressed genes in Ts65Dn vs. euploid that are rescued in Ts65Dn;*Brwd1*<sup>+/-</sup> vs. Ts65Dn in (left) embryonic/E17.5 forebrain, (middle) adult male hippocampus and (right) adult female hippocampus. Source data are provided as a source data file.

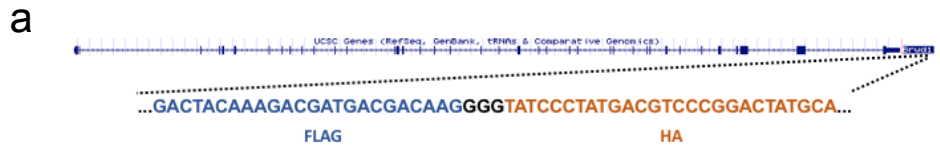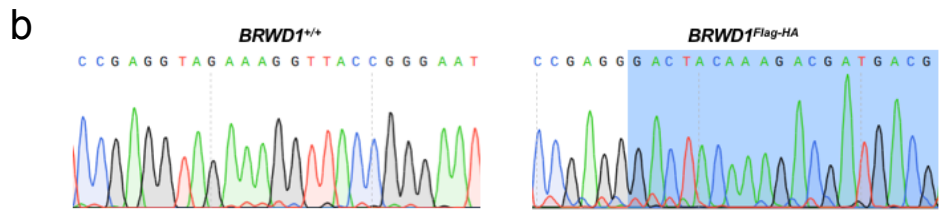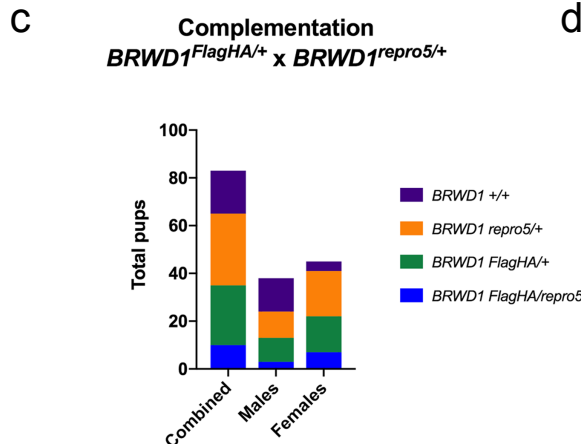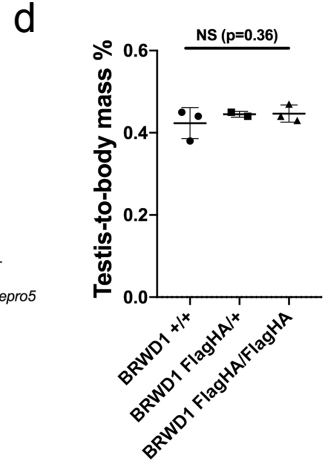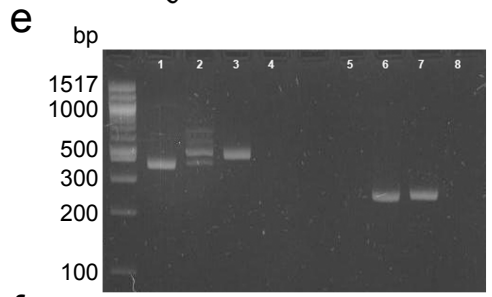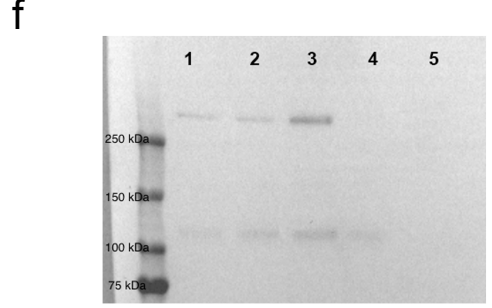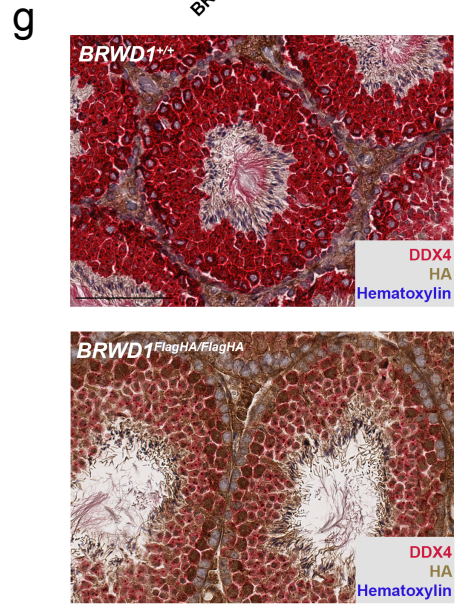

**Supplementary Figure 10. Generation and validation of *Brwd1*<sup>FLAG-HA</sup> mice.**

**(a)** Screenshot of the *Brwd1* sequence from the UCSC Genome Browser. The epitope sequence of 1xFLAG-GGG-1xHA was added to the C-terminus of the last exon. **(b)** Example chromatograms of wildtype vs. *Brwd1*<sup>Flag-HA</sup> mice. **(c)** Genetic complementation analyses demonstrate that *Brwd1*<sup>Flag-HA</sup> fully complements the null allele (*Brwd1*<sup>repro5</sup>). **(d)** Relative testis:body mass of epitope-tagged animals are comparable to wildtype mice.  $N = 2-3/\text{genotype}$ . One-way ANOVA comparing the three genotypes did not reveal significant differences ( $p = 0.36$ ) **(e)** *Brwd1* transcript levels in testes. Lanes 1-4 represent cDNA amplified by common *Brwd1* primers. Lane 1 = wildtype, Lane 2 = *Brwd1*<sup>FlagHA/+</sup>, Lane 3 = *Brwd1*<sup>FlagHA/FlagHA</sup> and Lane 4 = water control. Lanes 5-8 represent cDNA amplified by epitope-specific primers. Lane 1 = wildtype, Lane 2 = *Brwd1*<sup>FlagHA/+</sup>, Lane 3 = *Brwd1*<sup>FlagHA/FlagHA</sup> and Lane 4 = water control. Experiment repeated >3X. **(f)** Western blotting (uncropped) of testis protein probed with anti-HA. Lane 1 and 2 = *Brwd1*<sup>FlagHA/+</sup>, Lane 3 = *Brwd1*<sup>FlagHA/FlagHA</sup>, and Lanes 4 and 5 = wildtype. **(g)** Immunolabeled testis cross-sections from 8-week old males. DDX4 labels cytoplasm, HA labels epitope-tagged BRWD1, and hematoxylin counterstains the nucleus. BRWD1, as expected, is localized in nuclei of spermatocytes. Experiment repeated >3X. Data are presented as averages  $\pm$  SEM. Source data are provided as a source data file.

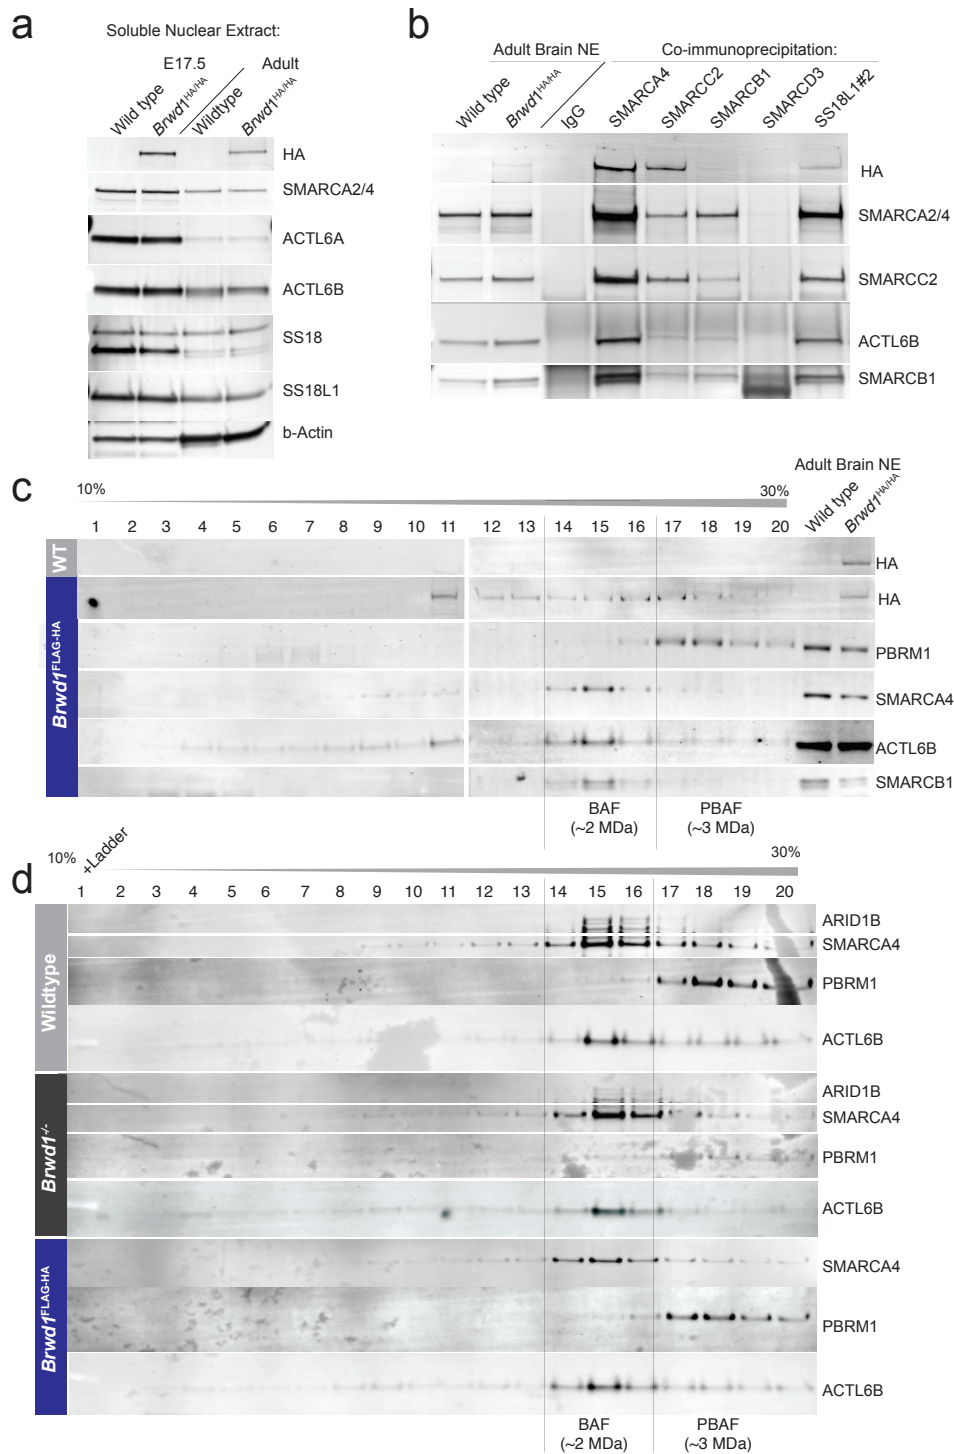

**Supplementary Figure 11. BRWD1 migrates at over 2 Mda on glycerol gradients and interacts with BAF complexes in brain nuclear extracts.**

(a) Detection of endogenous BRWD1-FLAG-HA protein in embryonic day 17.5 (E17.5) and adult mouse brain soluble nuclear protein extracts (NE) by immunoblotting with an antibody against HA. 7.5 µg of NE was loaded in each lane. (b) Glycerol gradient sedimentation analysis of whole brain NE from adult wildtype or *Brwd1*<sup>FLAG-HA</sup> mice indicates that BRWD1 is predominantly associates with high molecular weight protein complex(es). Subunits of the BAF complex are used as markers: SMARCA4 and BAF47 peaks indicate the 2 Mda canonical BAF complex and the PBRM1 peak indicates the 3 Mda PBAF complex. BRWD1-FLAG-HA also co-migrates with the neuronal-specific BAF subunit ACTL6B. (c) Antibodies to BAF subunits SMARCA4, SMARCC2, SS18L1 (#2, to an internal peptide) and, to some degree, SMARCB1 co-immunoprecipitate endogenously tagged BRWD1-FLAG-HA protein from adult mouse brain nuclear extract. SMARCA4, SMARCC2, and SMARCB1 are constitutive subunits, and SMARCD3 and SS18L1 are neuronal-enriched BAF subunits. The SMARCD3 antibody was ineffective at pulling down BAF. (d) Glycerol gradient sedimentation analysis of adult mouse brain NE from *Brwd1*<sup>-/-</sup> vs. wildtype or HA-tagged BRWD1 mice. Genetic deletion of *Brwd1* does not affect the migration of BAF complexes. Experiments repeated >3X. Source data are provided as a source data file. See **Supplemental Figure 15** for uncropped blots with MW markers.

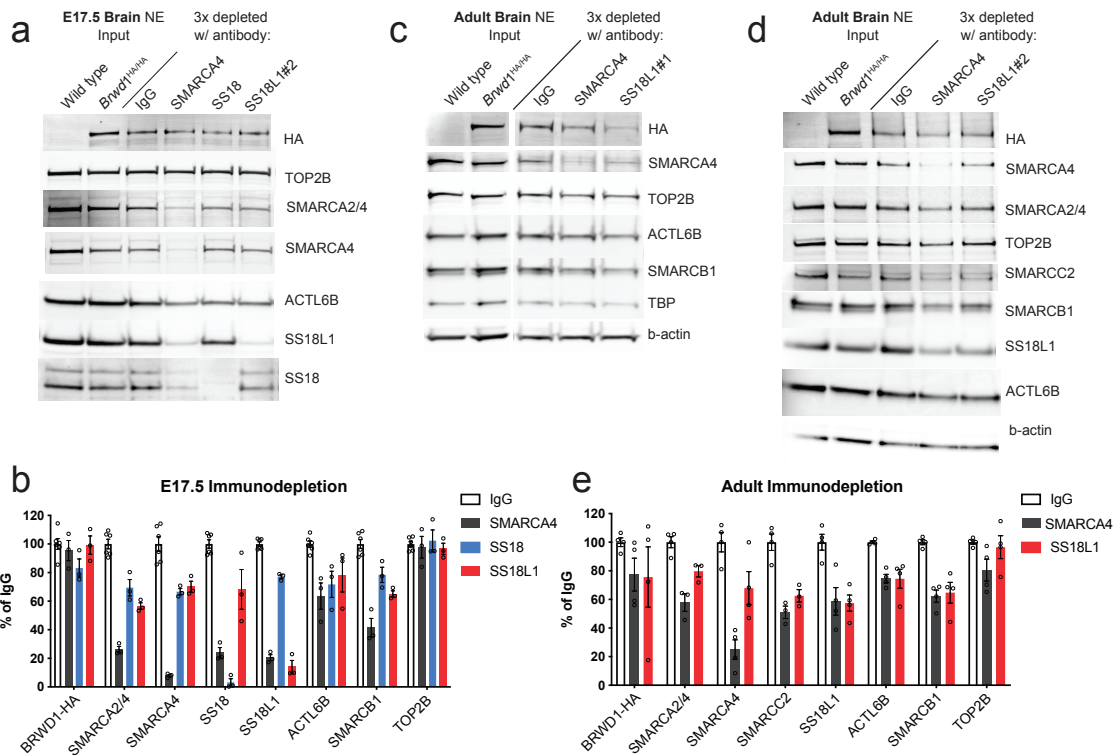

**Supplementary Figure 12. Antibodies against the BAF complex partially co-immunodeplete BRWD1 and other BAF subunits from brain nuclear extract.**

(a) Embryonic day 17.5 (E17.5) *Brwd1*<sup>FLAG-HA</sup> brain soluble nuclear extracts (NE) were subjected to 3 rounds of immunodepletion with antibodies to the BAF ATPase SMARCA4, the neural progenitor BAF subunit SS18, the neuronal BAF subunit SS18L1 (antibody #2), or IgG as a control. Immunoblotting for the C-terminal HA tag of endogenous BRWD1-FLAG-HA revealed modest co-immunodepletion with SS18. BAF subunits that were not direct targets of the antibody were likewise only modestly immunodepleted while subunits that were targeted by the antibody were selectively and almost completely depleted from the NE. (b) Quantification of a including replicate experiments (n=3) indicates ~18% co-immunodepletion of BRWD1 and ~25% immunodepletion of SMARCA2/4 with SS18 antibody (IgG: n = 6; SMARCA4, SS18 and SS18L1: n = 3). (c-d) Adult (male, 6 week old) *Brwd1*<sup>FLAG-HA</sup> brain soluble NE was subjected to 3

rounds of immunodepletion with SMARCA4, SS18L1 or IgG antibodies. Immunoblotting with HA antibody revealed modest co-immunodepletion of BRWD1-FLAG-HA and non-target BAF subunits with SMARCA4 antibody. The C-terminal SS18L1#1 antibody in c robustly co-immunodepleted BRWD1-FLAG-HA (n=1 experiment) while the internal SS18L1#2 antibody in d only slightly reduced BRWD1-FLAG-HA signal in the NE (representative of n=3 experiments).

(e) Quantification of all 4 experiments represented by c-d indicates that BRWD1-FLAG-HA is co-immunodepleted by ~20% on average with antibodies to BAF [IgG:  $n = 4$  for all proteins; SMARCA4:  $n = 4$  for all proteins except SMARCA2/4 and SS18L1 ( $n = 3$ )]. Data are presented as averages  $\pm$  SEM. Source data are provided as a source data file. See **Supplemental Figure 15** for uncropped blots with MW markers.



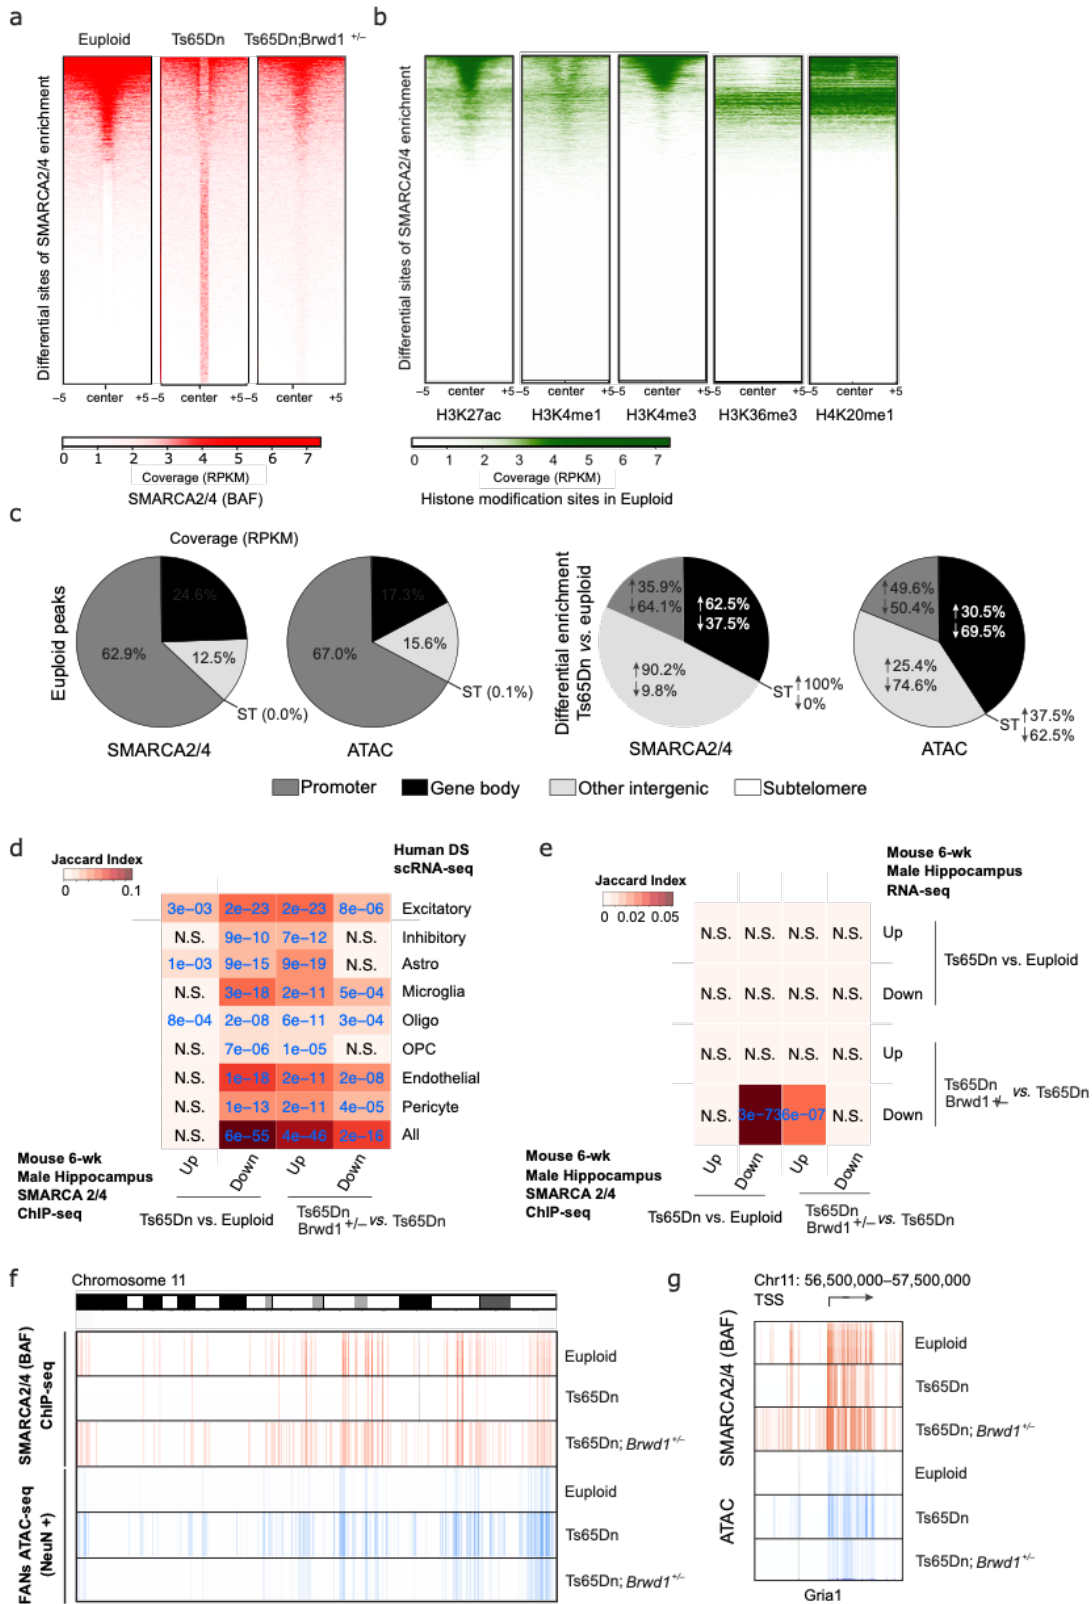

**Supplementary Figure 13. SMARCA2/4 is genically enriched in euploid hippocampus and displays alterations in genomic distribution in trisomic brain.**

(a) Genomic distribution of (left) SMARCA2/4 and ATAC peaks in euploid adult male hippocampus, as determined via MACSv2.1.124-based peak calling (FDR<0.05, FC>1.2 cutoffs applied after adjusting for multiple comparisons;  $n = 4$ /group; normalized against respective DNA inputs). (b) Using these same genomic coordinates, normalized enrichment heatmaps for permissive (H3K27ac, H3K4me1, H3K4me3, H3K36me3 and H4K20me1) histone modifications are provided. (c) diffReps analysis of (left) SMARCA2/4 and (right) ATAC differential enrichment comparing Ts65Dn vs. euploid adult male hippocampus ( $p < 0.0001$  cutoff applied;  $n = 3-4$ /group). Pie charts indicate distribution of differential enrichment events. (d) Odds ratio analyses (Fisher's exact test) depicting adj. p-values for overlap between PCGs displaying differential SMARCA2/4 enrichment and human DS RNA-seq profiles. (e) Odds ratio analyses (Fisher's exact test) depicting adj. p-values for overlap between PCGs displaying differential SMARCA2/4 enrichment and adult male Ts65Dn RNA-seq profiles. Representative genome browser tracks (igv, displayed in heatmap form) of (f) chromosome 11 (left) and (g) the *Grial* gene locus for Smarca2/4 and chromatin accessibility (ATAC) in euploid vs. Ts65Dn vs. Ts65Dn;*Brwd1*<sup>+/-</sup> adult male hippocampus. Source data are provided as a source data file.

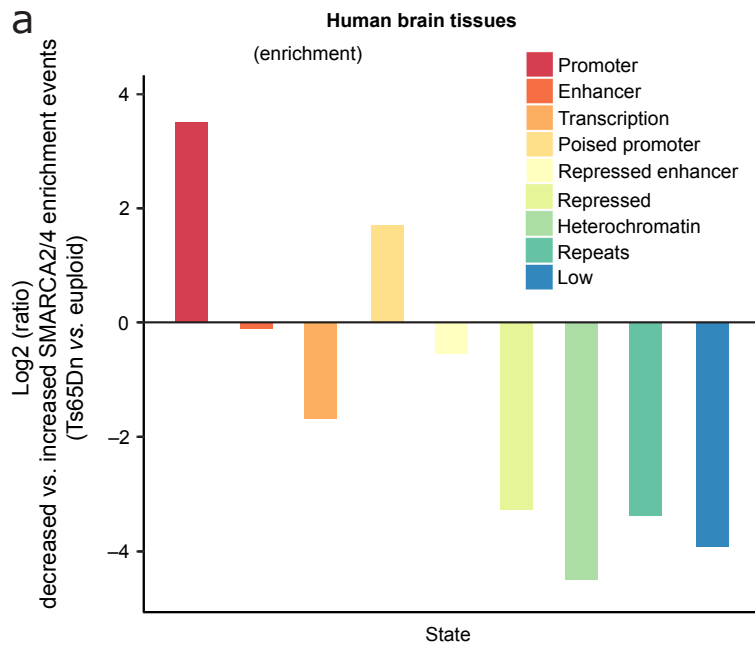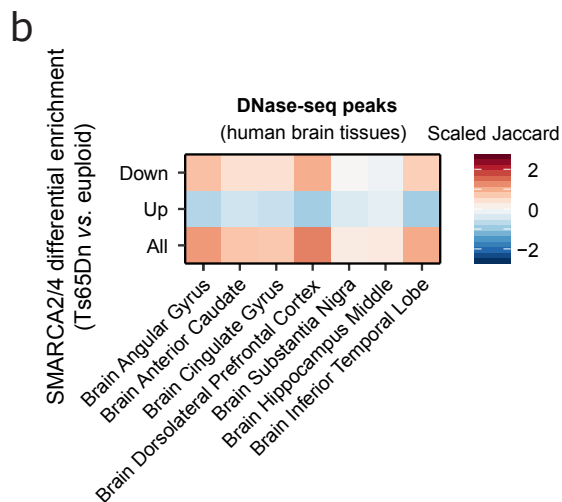

**Supplementary Figure 14. Mapping SMARCA2/4 differential enrichment events in trisomic mouse hippocampus against chromatin states identified in human brain.**

(a) Comparison of log<sub>2</sub> ratio of relative frequency between sites with significantly decreased vs. increased enrichment per chromatin state. (b) Overlap between open chromatin of seven brain regions assayed by DNase-seq from the Roadmap Epigenomics Project and significant differentially enriched sites for SMARCA2/4 (Ts65Dn vs. euploid). The overlap was quantified

using the “scaled” Jaccard index obtained by calculating standard deviations after subtracting the mean Jaccard index of the sample.

Up - sites with significantly increased SMARCA2/4 enrichment events; Down – sites with significantly decreased enrichment events; All: sites significantly increased or decreased enrichment events. Source data are provided as a source data file.

**Supplemental Figure 15. Uncropped western blots with MW markers**

Raw Western Blot scans for Fig. 3B:

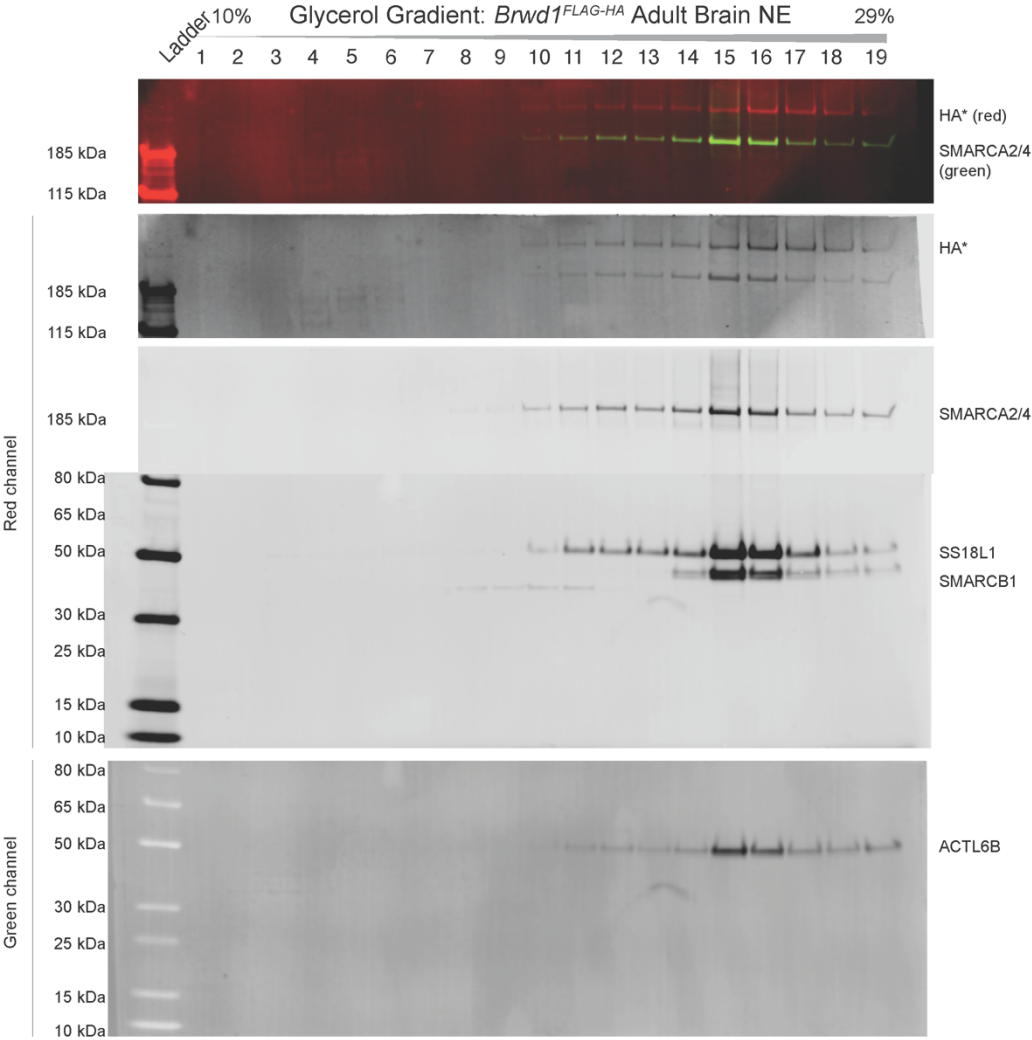

\*BRWD1-FLAG-HA is approximately 260 kDA

Raw Western Blot scans for Fig. 3C:

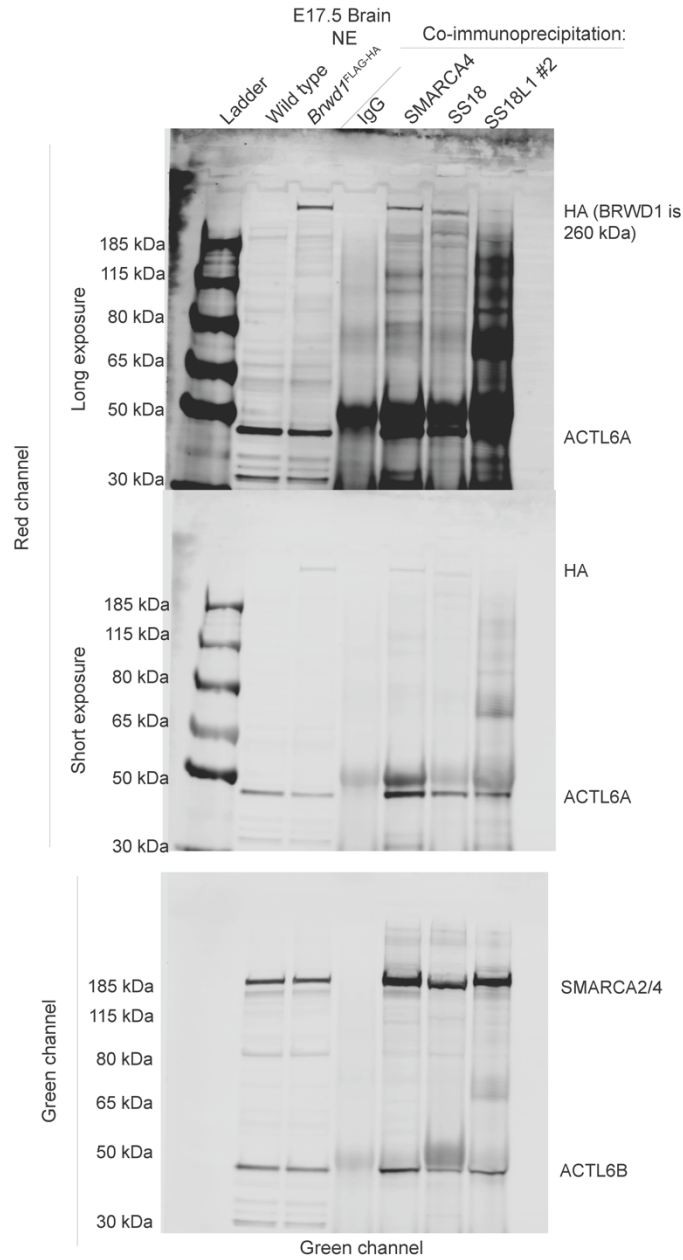

Raw Western Blot scans for Fig. 3D:

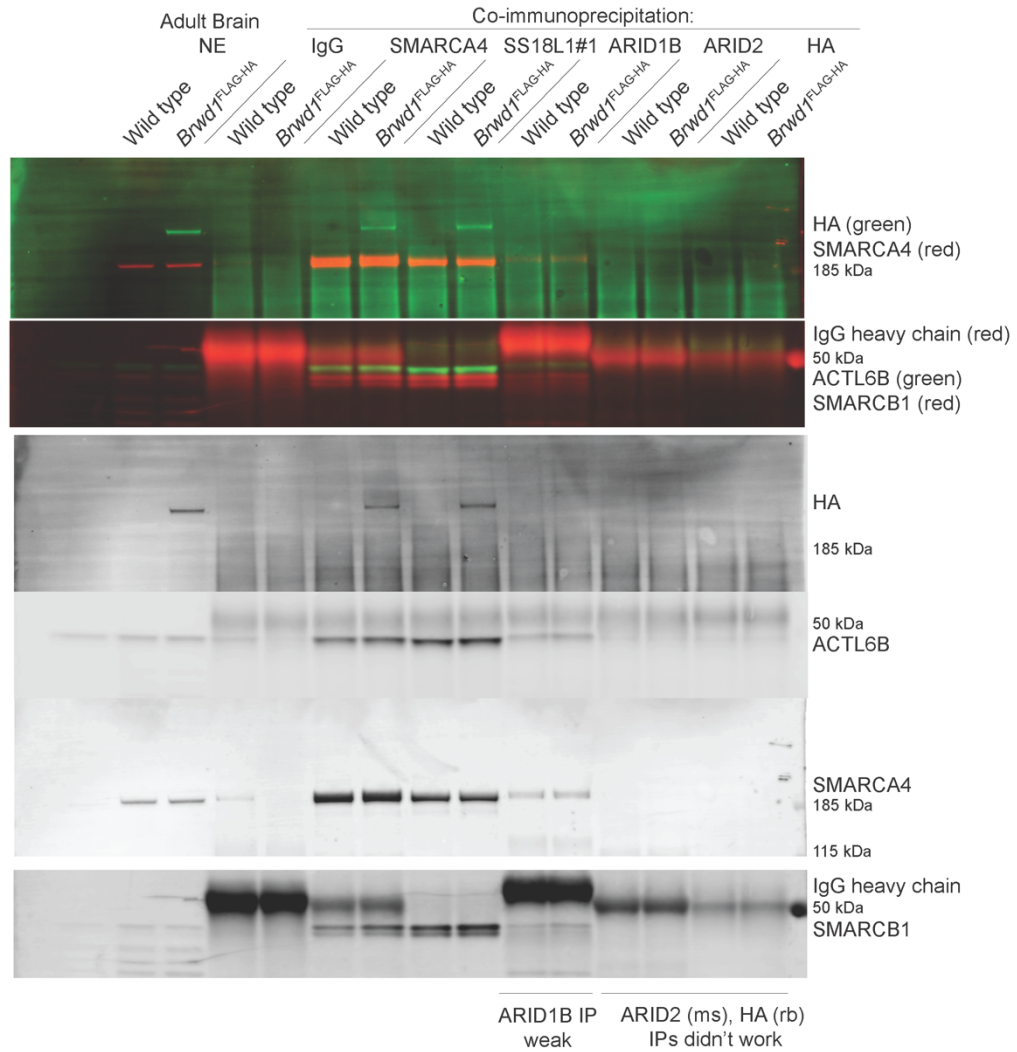

## Raw Western Blot scans for Fig. 3E:

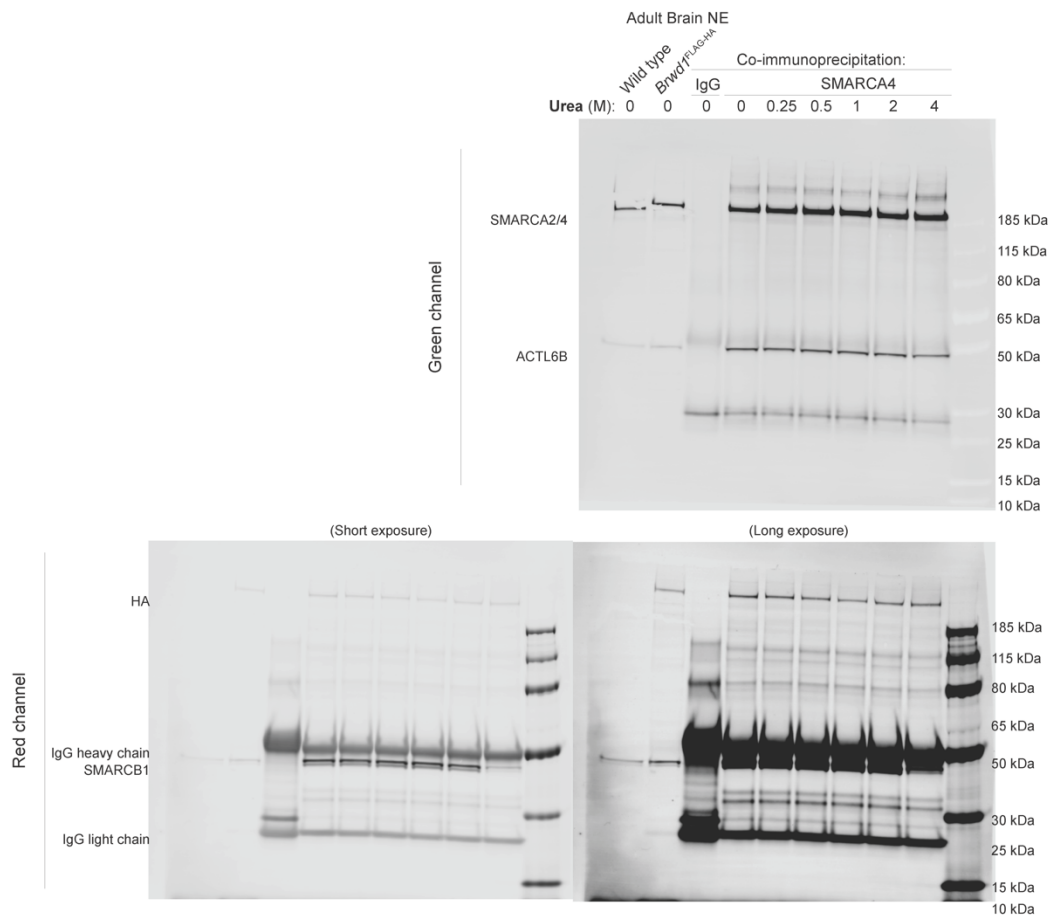

## Replicate urea denaturation data used to generate Fig. 3F

| Urea (M) | Brwd1-HA      |               |               | Baf53b        |               |               | Baf47         |               |               |
|----------|---------------|---------------|---------------|---------------|---------------|---------------|---------------|---------------|---------------|
| X        | A:Y1          | A:Y2          | A:Y3          | B:Y1          | B:Y2          | B:Y3          | C:Y1          | C:Y2          | C:Y3          |
| 0.00     | 100.000000000 | 100.000000000 | 100.000000000 | 99.137531860  | 100.000000000 | 87.079934180  | 86.614148220  | 100.000000000 | 91.747532160  |
| 0.25     | 62.471172420  | 66.980000000  | 59.879847280  | 100.000000000 | 70.850000000  | 100.387556600 | 100.000000000 | 81.290000000  | 115.680708100 |
| 0.50     | 36.904542390  | 44.120000000  | 25.572633770  | 88.615989590  | 68.590000000  | 93.821982920  | 97.540701930  | 80.320000000  | 98.902218480  |
| 1.00     | 42.007932760  | 29.950000000  |               | 87.582770950  | 67.810000000  |               | 98.361869500  | 77.990000000  |               |
| 2.00     | 36.214648180  | 42.020000000  | 54.793494950  | 82.428897140  | 69.830000000  | 118.710526300 | 74.902697100  | 65.270000000  | 81.460083380  |
| 4.00     |               | 36.740000000  | 43.757618740  |               | 49.090000000  | 73.411251410  |               | 8.620000000   | 4.550811323   |



# Raw Western Blot scans for Extended Data Fig. 11A:

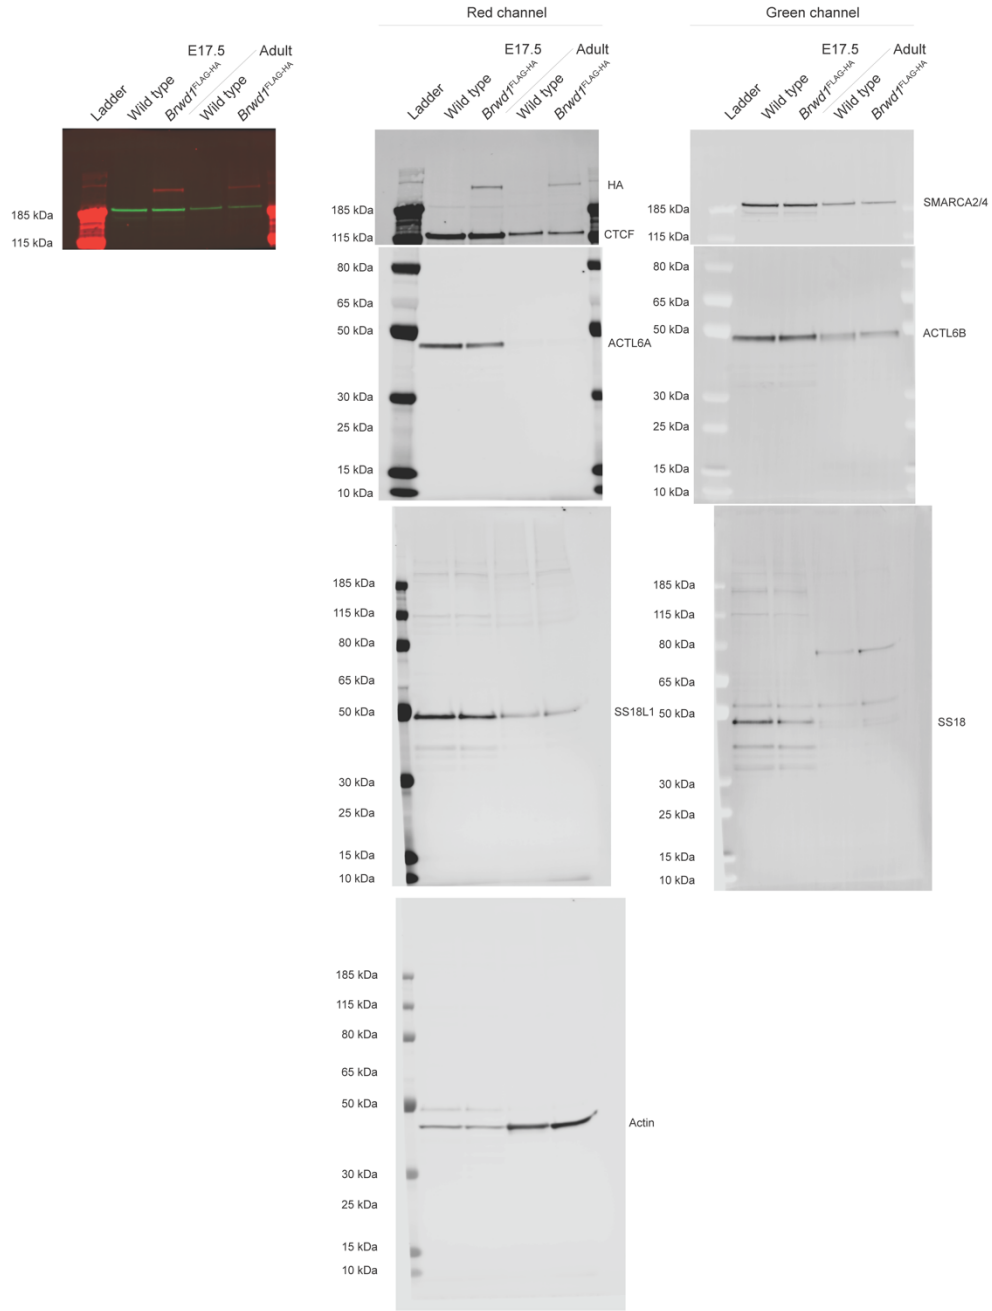

Raw Western Blot scans for Extended Data Fig. 11B:

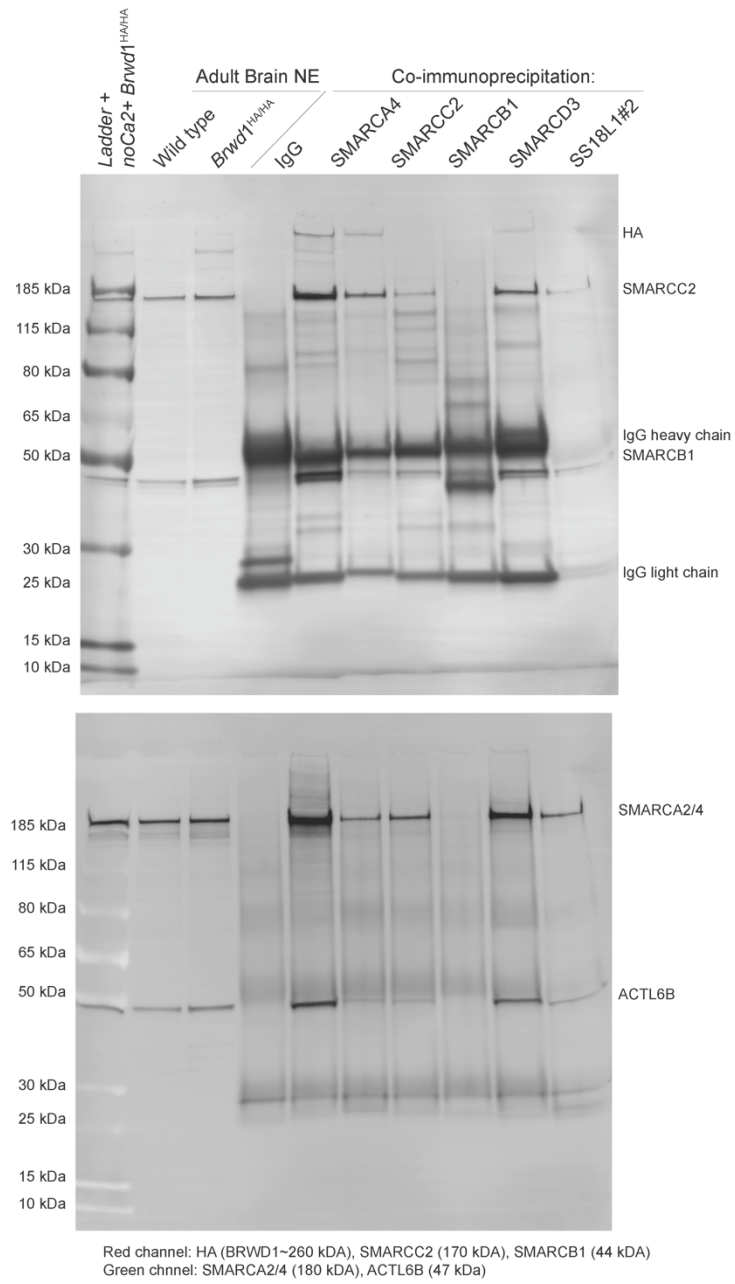

Raw Western Blot scans for Extended Data Fig. 11C:

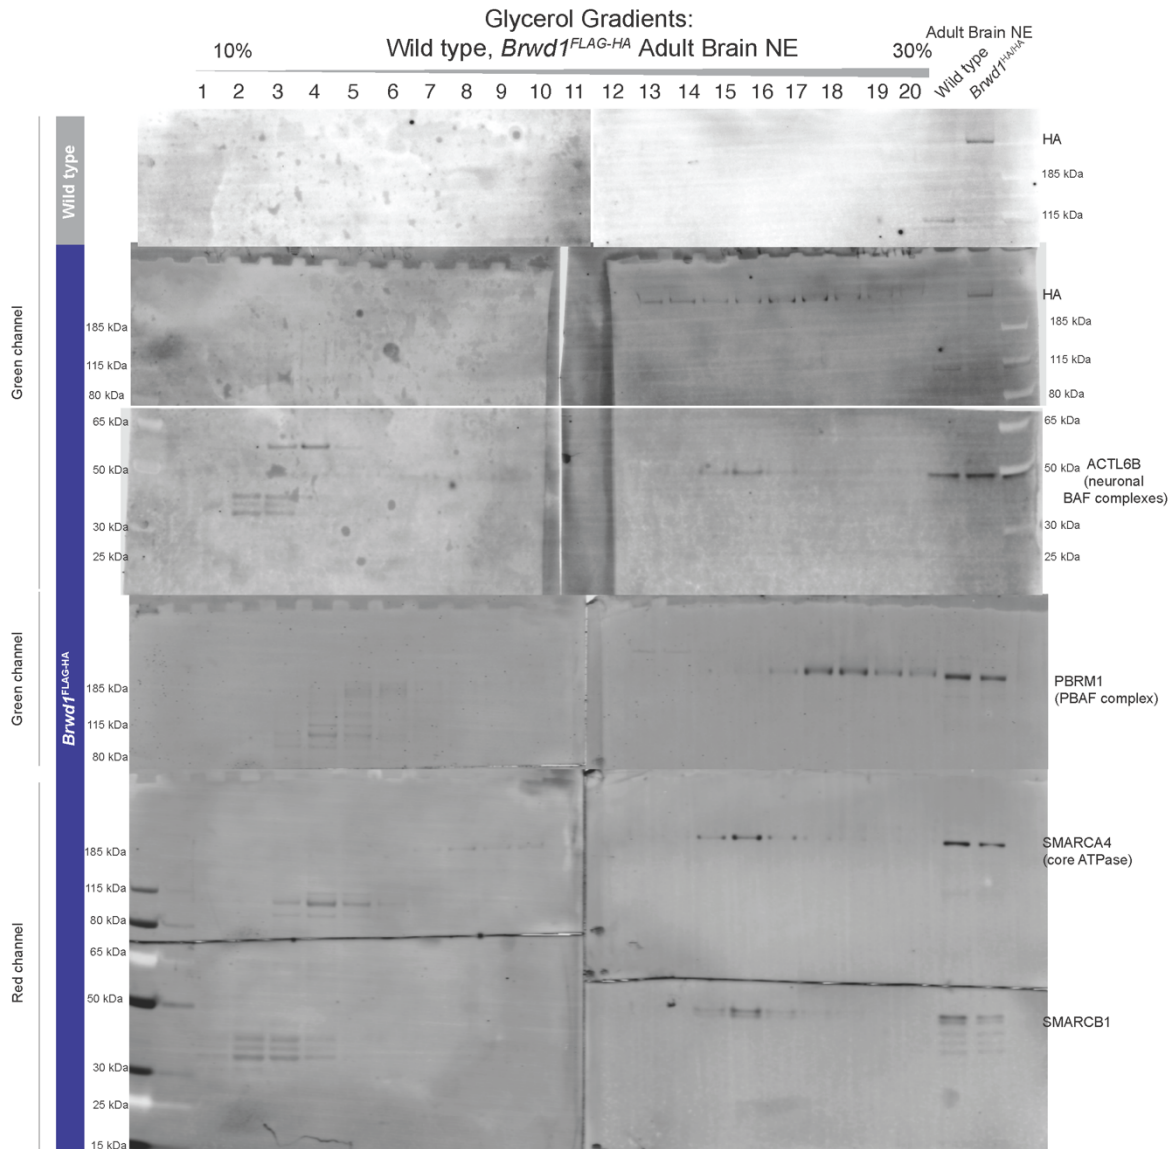

Raw Western Blot scans for Extended Data Fig. 11D, part 1:

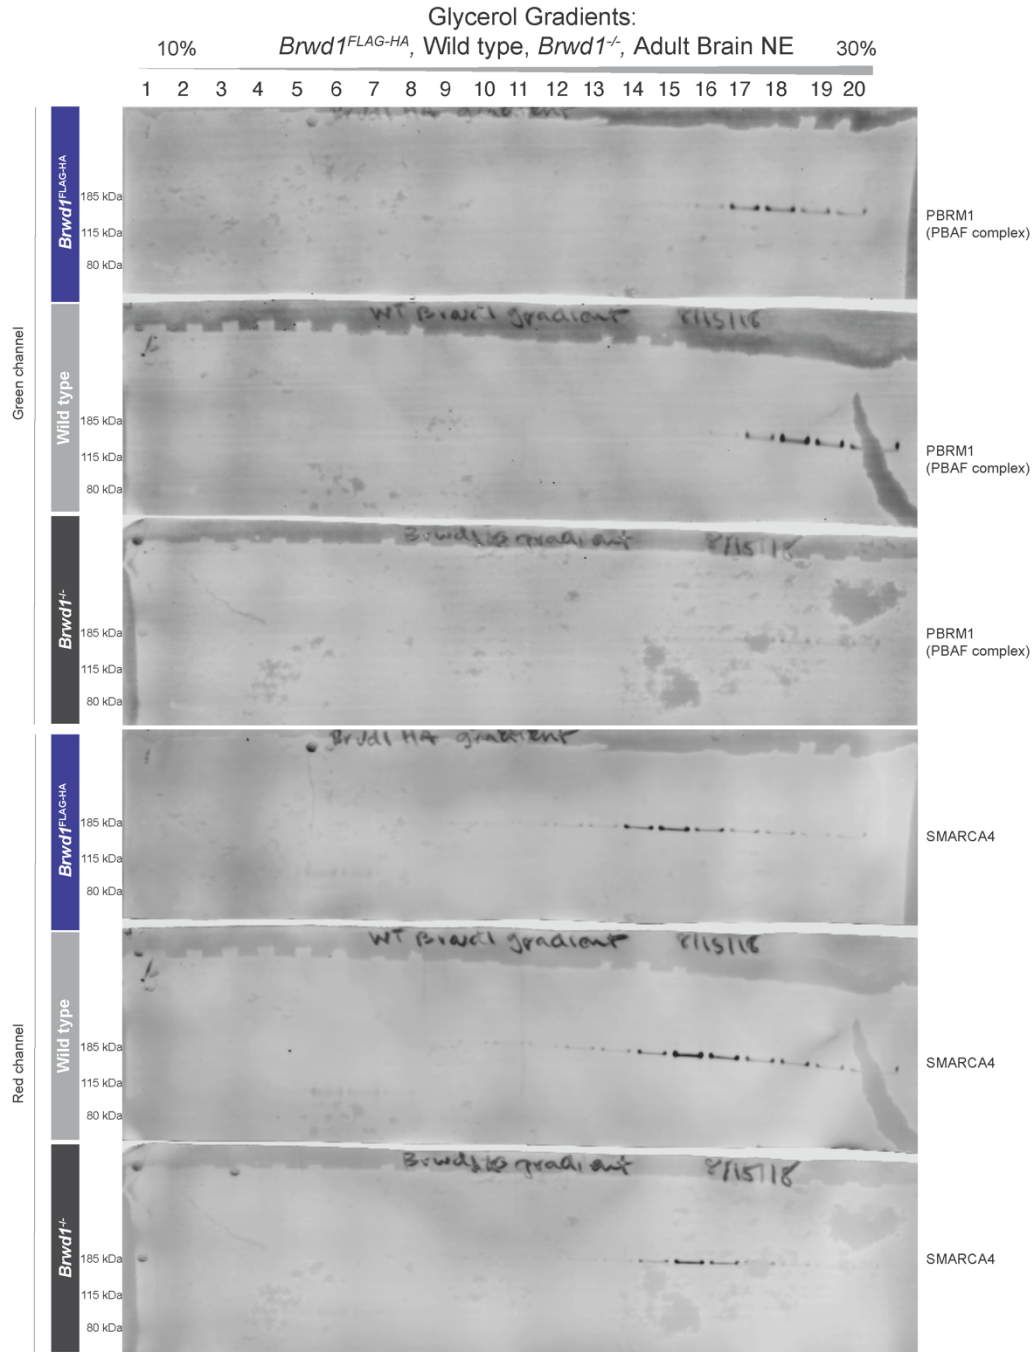

Raw Western Blot scans for Extended Data Fig. 11D, part 2:

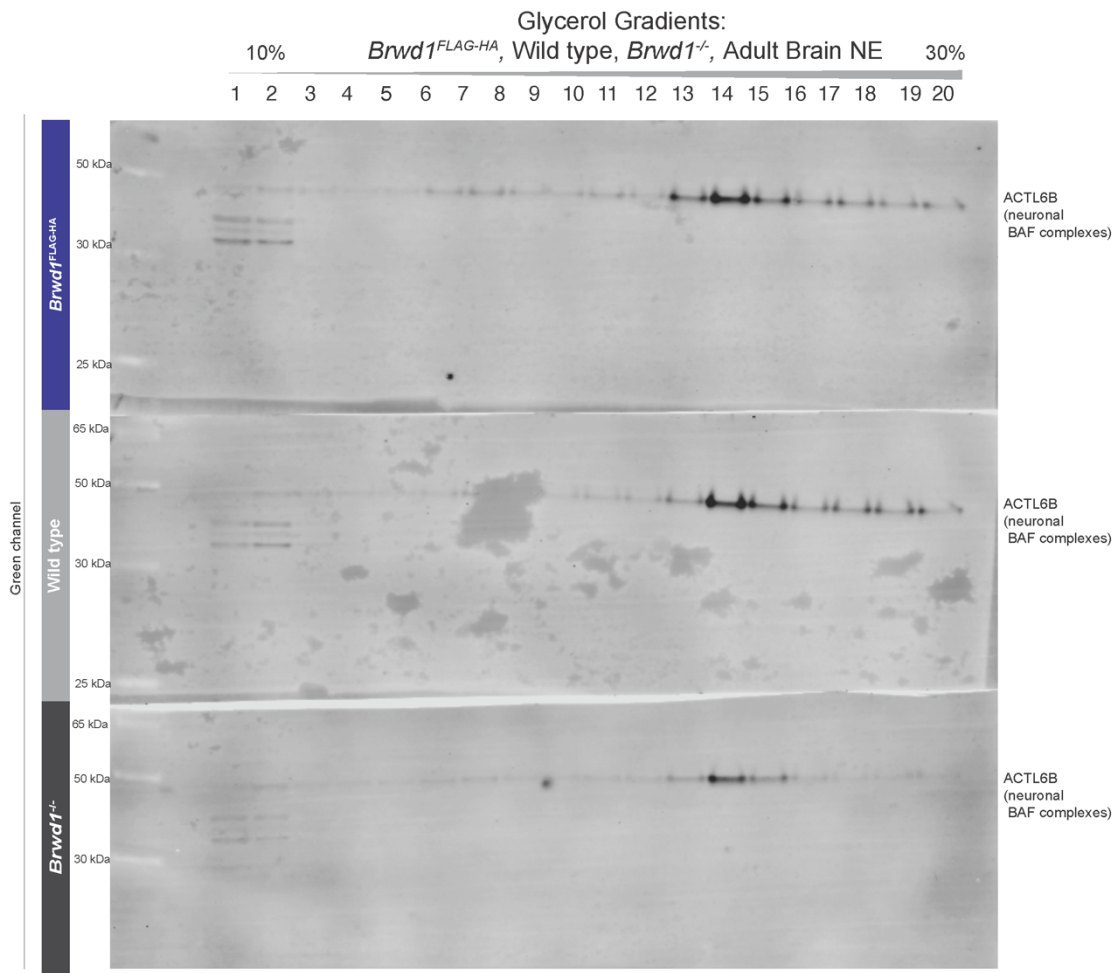

Raw Western Blot scans for Extended Data Fig. 11D, part 3:

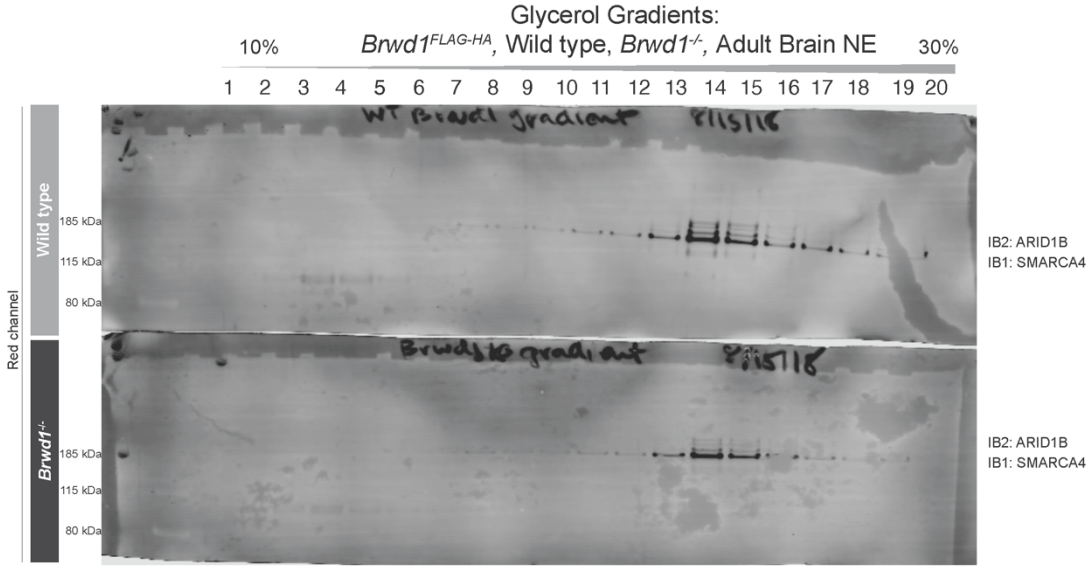



## Raw Western Blot scans for Extended Data Fig. 12A

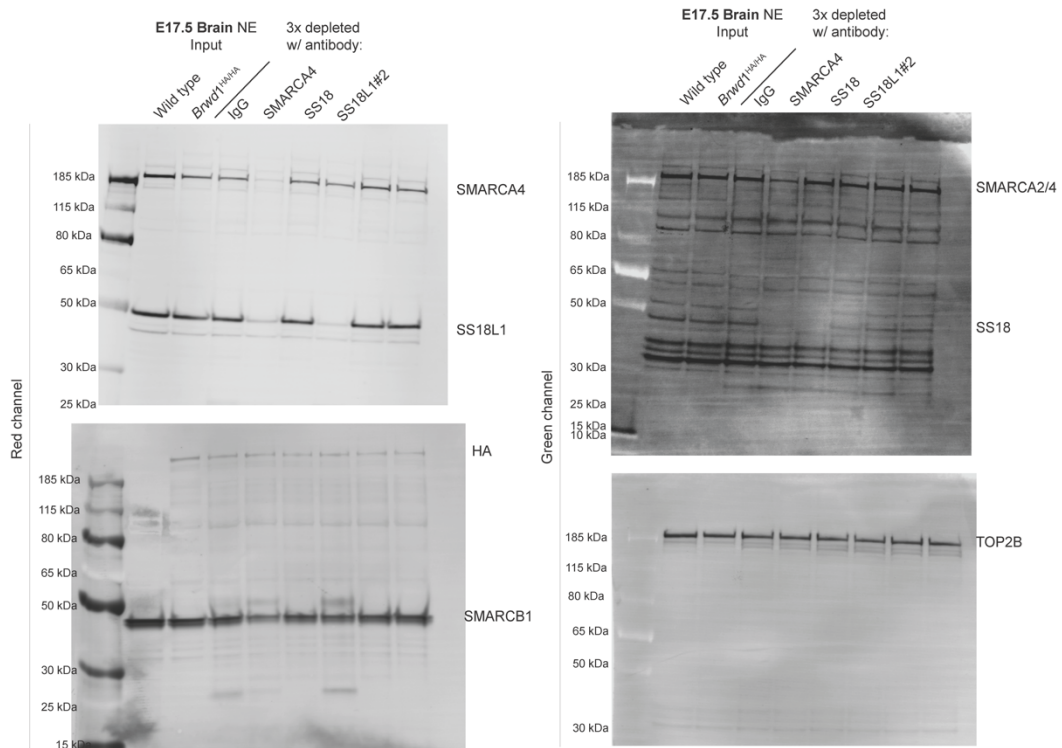

## Replicate E17 Immunodepletion data shown in Extended Data Fig. 12B

|   | IgG       | SMARCA4      |              |              |              |              |              | SS18         |               |               |              |              |               | SS18L1        |               |              |
|---|-----------|--------------|--------------|--------------|--------------|--------------|--------------|--------------|---------------|---------------|--------------|--------------|---------------|---------------|---------------|--------------|
|   |           | A:Y1         | A:Y2         | A:Y3         | A:Y4         | A:Y5         | A:Y6         | B:Y1         | B:Y2          | B:Y3          | C:Y1         | C:Y2         | C:Y3          | D:Y1          | D:Y2          | D:Y3         |
| 1 | BRWD1-HA  | 114.46534820 | 85.53485176  | 101.91691780 | 98.08308224  | 100.77379820 | 99.22620185  | 96.105268800 | 107.170591000 | 82.874869800  | 75.140424040 | 78.873397570 | 95.616940010  | 110.497355000 | 88.245102380  | 98.976007170 |
| 2 | SMARCA2/4 | 108.79050170 | 93.20949833  | 105.92168920 | 94.07833080  | 90.56689252  | 106.41310750 | 24.220965240 | 30.501905080  | 23.870738250  | 66.881706350 | 61.024333590 | 80.307354820  | 60.958485670  | 55.477272410  | 63.350505360 |
| 3 | SMARCA4   | 85.71580253  | 114.28413750 | 105.43611650 | 94.96388352  | 87.56134241  | 112.44885760 | 6.224390441  | 9.237941498   | 8.225199079   | 63.375619620 | 70.865941380 | 65.683393980  | 67.159035110  | 77.691850940  | 65.361372120 |
| 4 | SS18      | 107.80410130 | 92.39589671  | 106.55646150 | 93.44353846  | 105.48909840 | 94.50091364  | 20.742021860 | 31.183339020  | 19.915712470  | 0.235602321  | 8.375144703  | 0.958939734   | 64.722052280  | 93.915370850  | 46.072144840 |
| 5 | SS18L1    | 96.63841768  | 103.36158230 | 96.26312386  | 103.71687610 | 97.25610257  | 102.74386740 | 17.341757350 | 24.500649890  | 19.981174200  | 77.930192770 | 74.422376300 | 78.973530050  | 9.501436956   | 22.941762210  | 9.970148302  |
| 6 | ACTL6B    | 91.92852768  | 106.07147230 | 100.89357050 | 99.10642947  | 103.01268130 | 96.96731867  | 45.622827910 | 75.932344010  | 69.056122320  | 83.967202040 | 84.375863930 | 77.043623340  | 54.781488490  | 88.013469380  | 92.260295340 |
| 7 | SMARCB1   | 90.97563143  | 109.02436860 | 103.82657640 | 96.17542380  | 92.48619536  | 107.53380480 | 64.313221590 | 35.915879370  | 34.141762470  | 88.089576050 | 77.822601590 | 69.573889600  | 82.118692160  | 89.336319620  | 63.566669870 |
| 8 | TOP2B     | 94.73012868  | 105.28987130 | 95.36957995  | 104.83402400 | 98.55007950  | 101.44992420 | 84.020206940 | 98.827407120  | 110.379780800 | 95.030648370 | 94.896855330 | 117.266443700 | 90.872453830  | 103.967576100 | 95.205566990 |

# Raw Western Blot scans for Extended Data Fig. 12C

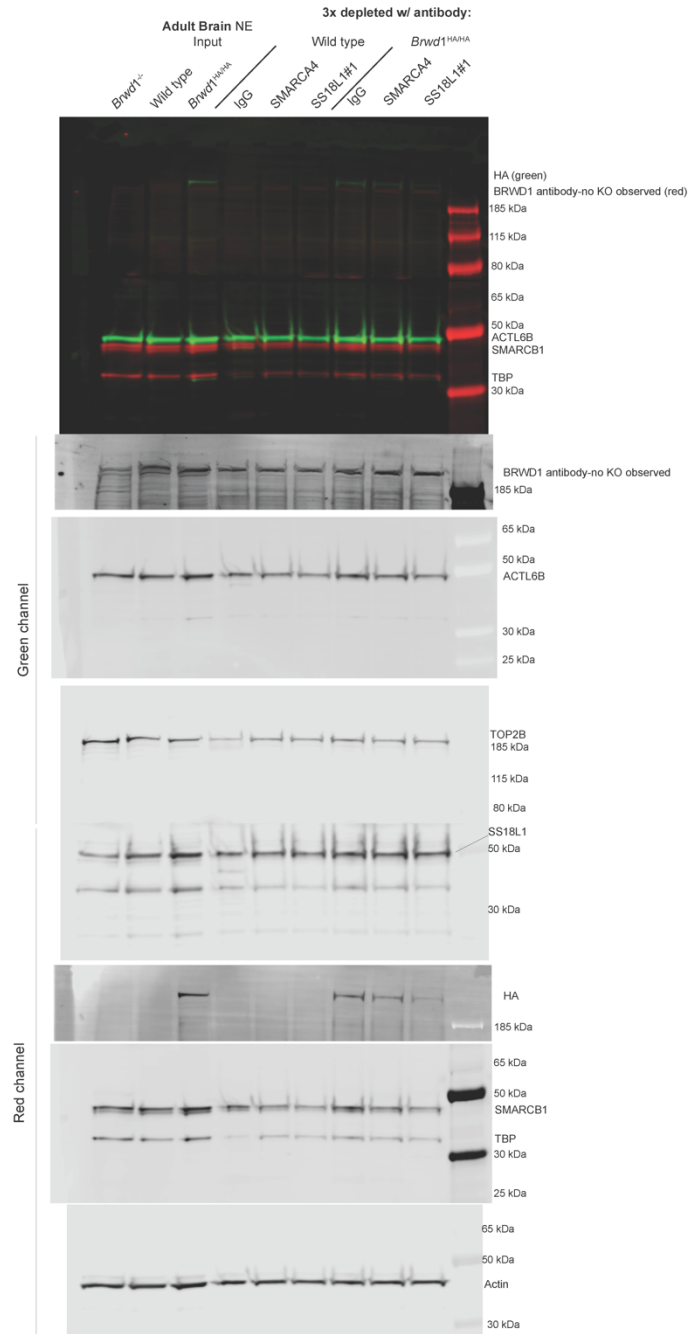



## Raw Western Blot scans for Extended Data Fig. 12D

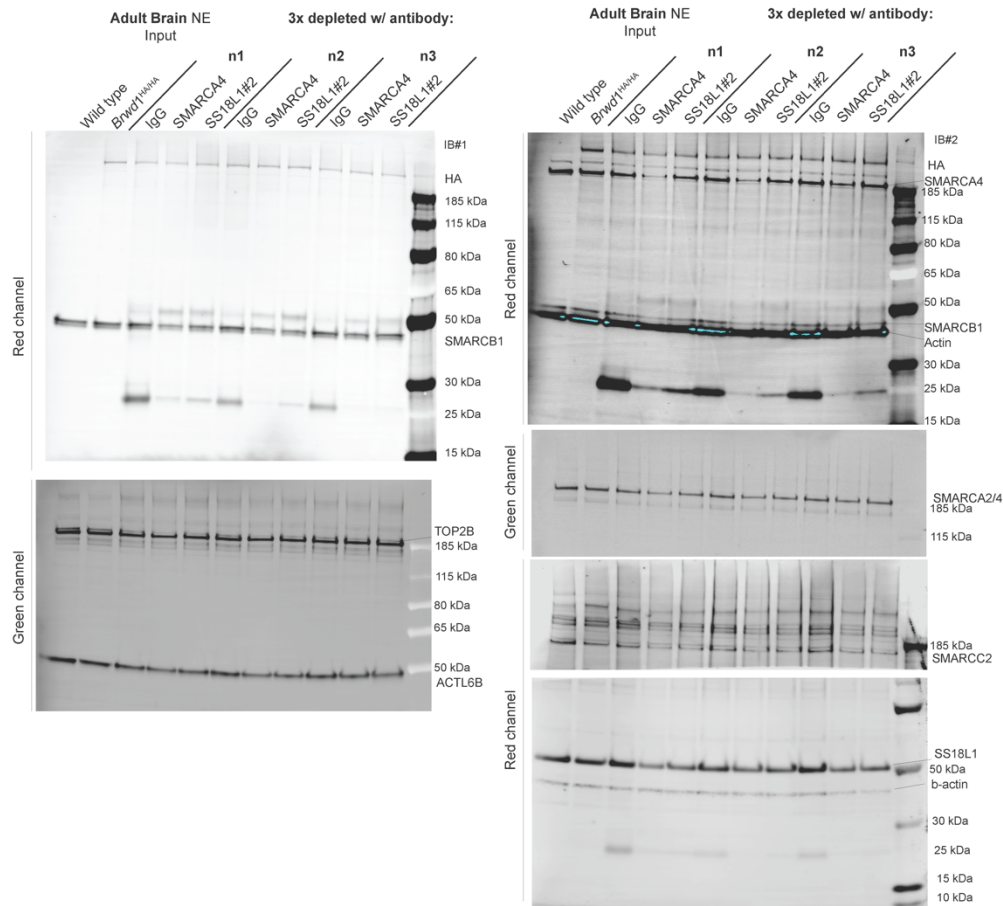

## Replicate Adult Immunodepletion data shown in Extended Data Fig. 12E

|           | IgG           |               |               |               | SMARCA4      |              |              |              | SS18L1       |               |               |              |
|-----------|---------------|---------------|---------------|---------------|--------------|--------------|--------------|--------------|--------------|---------------|---------------|--------------|
|           | A:Y1          | A:Y2          | A:Y3          | A:Y4          | B:Y1         | B:Y2         | B:Y3         | B:Y4         | C:Y1         | C:Y2          | C:Y3          | C:Y4         |
| BRWD1-HA  | 91.938617770  | 101.465845900 | 106.595536300 | 100.000000000 | 56.004556940 | 94.753016590 | 99.611719620 | 59.080000000 | 72.313252890 | 101.706410100 | 111.045805900 | 17.530000000 |
| SMARCA2/4 | 86.998178600  | 105.397313300 | 105.604508100 | 100.000000000 | 45.602327000 | 64.424934000 | 63.386664800 |              | 71.839602600 | 83.885549100  | 83.548314600  |              |
| SMARCA4   | 81.132954900  | 106.912257600 | 111.954787500 | 100.000000000 | 8.429931300  | 19.365107400 | 33.514611500 | 38.520000000 | 56.120092400 | 68.288260500  | 99.984665000  | 47.000000000 |
| SMARCC2   | 83.998766600  | 106.131030000 | 109.870203400 | 100.000000000 | 42.815790900 | 52.366580200 | 57.684651600 |              | 62.060444700 | 70.283475300  | 65.230074100  |              |
| SS18L1    | 103.117172500 | 85.127596900  | 111.755230600 | 100.000000000 | 38.879702700 | 59.321240300 | 51.948888800 | 64.390000000 | 56.248478500 | 70.670109600  | 59.352378100  | 43.520000000 |
| ACTL6B    | 98.424957900  | 99.288780500  | 102.286261500 | 100.000000000 | 72.230269600 | 67.980068200 | 82.295160300 | 75.690000000 | 81.417557700 | 78.265638900  | 83.121936900  | 54.960000000 |
| SMARCB1   | 95.272182260  | 100.963323200 | 103.764494600 | 100.000000000 | 50.295156540 | 62.144324190 | 68.886682610 | 67.700000000 | 68.597347690 | 67.777166450  | 78.294693710  | 44.240000000 |
| TOP2B     | 96.097728600  | 100.731106900 | 103.171164600 | 100.000000000 | 65.203429400 | 89.226629500 | 97.394366500 | 70.240000000 | 99.079815500 | 96.536109200  | 114.725920100 | 75.770000000 |
