# Supplementary material for: Rescue of deficits by Brwd1 copy number restoration in the Ts65Dn mouse model of Down syndrome
Source: PubMed Central journal article supplement (PMC9606253; doi:10.1038/s41467-022-34200-0), 2022-10-26
Supplement: 41467_2022_34200_MOESM13_ESM.pdf [file 41467_2022_34200_MOESM13_ESM.pdf]

## Reporting Summary

Nature Portfolio wishes to improve the reproducibility of the work that we publish. This form provides structure for consistency and transparency in reporting. For further information on Nature Portfolio policies, see our [Editorial Policies](#) and the [Editorial Policy Checklist](#).

### Statistics

For all statistical analyses, confirm that the following items are present in the figure legend, table legend, main text, or Methods section.

- |                                     |                                                                                                                                                                                                                                                                                                |
|-------------------------------------|------------------------------------------------------------------------------------------------------------------------------------------------------------------------------------------------------------------------------------------------------------------------------------------------|
| n/a                                 | Confirmed                                                                                                                                                                                                                                                                                      |
| <input type="checkbox"/>            | <input checked="" type="checkbox"/> The exact sample size ( $n$ ) for each experimental group/condition, given as a discrete number and unit of measurement                                                                                                                                    |
| <input type="checkbox"/>            | <input checked="" type="checkbox"/> A statement on whether measurements were taken from distinct samples or whether the same sample was measured repeatedly                                                                                                                                    |
| <input type="checkbox"/>            | <input checked="" type="checkbox"/> The statistical test(s) used AND whether they are one- or two-sided<br><i>Only common tests should be described solely by name; describe more complex techniques in the Methods section.</i>                                                               |
| <input checked="" type="checkbox"/> | <input type="checkbox"/> A description of all covariates tested                                                                                                                                                                                                                                |
| <input type="checkbox"/>            | <input checked="" type="checkbox"/> A description of any assumptions or corrections, such as tests of normality and adjustment for multiple comparisons                                                                                                                                        |
| <input type="checkbox"/>            | <input checked="" type="checkbox"/> A full description of the statistical parameters including central tendency (e.g. means) or other basic estimates (e.g. regression coefficient) AND variation (e.g. standard deviation) or associated estimates of uncertainty (e.g. confidence intervals) |
| <input type="checkbox"/>            | <input checked="" type="checkbox"/> For null hypothesis testing, the test statistic (e.g. $F$ , $t$ , $r$ ) with confidence intervals, effect sizes, degrees of freedom and $P$ value noted<br><i>Give <math>P</math> values as exact values whenever suitable.</i>                            |
| <input checked="" type="checkbox"/> | <input type="checkbox"/> For Bayesian analysis, information on the choice of priors and Markov chain Monte Carlo settings                                                                                                                                                                      |
| <input checked="" type="checkbox"/> | <input type="checkbox"/> For hierarchical and complex designs, identification of the appropriate level for tests and full reporting of outcomes                                                                                                                                                |
| <input checked="" type="checkbox"/> | <input type="checkbox"/> Estimates of effect sizes (e.g. Cohen's $d$ , Pearson's $r$ ), indicating how they were calculated                                                                                                                                                                    |

*Our web collection on [statistics for biologists](#) contains articles on many of the points above.*

### Software and code

Policy information about [availability of computer code](#)

Data collection

Data analysis March 2021

**Overlap with existing epigenomic annotations**

We computed the overlap of significant differentially bound sites of SMARCA2/4 (Ts65Dn vs. euploid) and chromatin states from the Epigenomics Roadmap Project using the scaled Jaccard index, obtained by calculating standard deviations after subtracting the mean of the sample (Jaccard index is an intersection of base pairs divided by the union of base pairs). We used the “expanded” chromHMM 18-state (6 histone marks, 98 epigenome model) for seven brain regions, i.e., angular gyrus, anterior caudate, cingulate gyrus, dorsolateral prefrontal cortex, hippocampus, inferior temporal lobe and substantia nigra. To improve interpretability, we consolidated the 18 states into 9 states as follows: Promoter (TssA, TssFlnk, TssFlnkU, and TssFlnkD), Enhancer (EnhG1, EnhG2, EnhA1, EnhA2, EnhWk), Transcription (Tx, TxWk), Poised promoter (TssBiv), Repressed enhancer (EnhBiv), Repressed (ReprPC, ReprPCWk), Heterochromatin (Het), Repeats (ZNF/Rpts) and Low (Quies).

To compare our significant differentially bound sites with known regions of open chromatin in different brain regions, we used imputed versions of DNase-seq datasets from Epigenomics Roadmap Project.

**PATCH ELECTROPHYSIOLOGY**

sEPSC and sIPSC were analyzed with the MiniAnalysis 6.0.3 software (Synaptosoft)

For manuscripts utilizing custom algorithms or software that are central to the research but not yet described in published literature, software must be made available to editors and reviewers. We strongly encourage code deposition in a community repository (e.g. GitHub). See the Nature Portfolio [guidelines for submitting code & software](#) for further information.

## Data

Policy information about [availability of data](#)

All manuscripts must include a [data availability statement](#). This statement should provide the following information, where applicable:

- Accession codes, unique identifiers, or web links for publicly available datasets
- A description of any restrictions on data availability
- For clinical datasets or third party data, please ensure that the statement adheres to our [policy](#)

Data and Materials Availability: Data from RNA-seq, ChIP-seq and ATAC-seq experiments have been deposited in the National Center for Biotechnology Information Gene Expression Omnibus (GEO) database under accession numbers GSE210117 and GSE151255. We declare that the data supporting findings for this study are available within the article and Supplementary Information. No restrictions on data availability apply.

## Human research participants

Policy information about [studies involving human research participants and Sex and Gender in Research](#).

|                             |     |
|-----------------------------|-----|
| Reporting on sex and gender | N/A |
| Population characteristics  | N/A |
| Recruitment                 | N/A |
| Ethics oversight            | N/A |

Note that full information on the approval of the study protocol must also be provided in the manuscript.

## Field-specific reporting

Please select the one below that is the best fit for your research. If you are not sure, read the appropriate sections before making your selection.

- Life sciences       Behavioural & social sciences       Ecological, evolutionary & environmental sciences

For a reference copy of the document with all sections, see [nature.com/documents/nr-reporting-summary-flat.pdf](https://www.nature.com/documents/nr-reporting-summary-flat.pdf)

## Life sciences study design

All studies must disclose on these points even when the disclosure is negative.

|                 |                                                                                                                                                                                                                                                                                                                                                                                                                                                                                                                                                                    |
|-----------------|--------------------------------------------------------------------------------------------------------------------------------------------------------------------------------------------------------------------------------------------------------------------------------------------------------------------------------------------------------------------------------------------------------------------------------------------------------------------------------------------------------------------------------------------------------------------|
| Sample size     | Adequate sample sizes are generally determined based upon inter-sample variability. Throughout the manuscript, we determined the significance of results based upon a general confidence interval of 95%. We do not include specific justifications of sample size within the methods (e.g., power analyses), as sample sizes were based on extensive laboratory experience with these endpoints. The sample sizes chosen are consistent with those used by others in the field to achieve statistically significant results comparing euploid vs. Ts65Dn animals. |
| Data exclusions | No data were excluded.                                                                                                                                                                                                                                                                                                                                                                                                                                                                                                                                             |
| Replication     | All biological endpoints were reliably reproduced using numerous biological (>3 for all experiments in which statistics were employed) and technical replicates for each experiment. All novel tools/mouse lines used in this study were extensively validated, as demonstrated in the                                                                                                                                                                                                                                                                             |

manuscript submission.

|               |                                                                                                                                                                                                                                                                                  |
|---------------|----------------------------------------------------------------------------------------------------------------------------------------------------------------------------------------------------------------------------------------------------------------------------------|
| Randomization | For all behavioral, electrophysiological and genomic analyses, animals were randomly assigned to groups (segregated by viral treatments and/or genotype). Tissue samples were not pooled from multiple animals in these studies (i.e., each n represents a discrete data point). |
| Blinding      | For all behavioral, electrophysiological and genomic analyses, investigators were blinded to conditions such as genotype, viral treatment conditions, etc. prior to analysis.                                                                                                    |

## Reporting for specific materials, systems and methods

We require information from authors about some types of materials, experimental systems and methods used in many studies. Here, indicate whether each material, system or method listed is relevant to your study. If you are not sure if a list item applies to your research, read the appropriate section before selecting a response.

### Materials & experimental systems

| n/a                                 | Included in the study                                           |
|-------------------------------------|-----------------------------------------------------------------|
| <input type="checkbox"/>            | <input checked="" type="checkbox"/> Antibodies                  |
| <input checked="" type="checkbox"/> | <input type="checkbox"/> Eukaryotic cell lines                  |
| <input checked="" type="checkbox"/> | <input type="checkbox"/> Palaeontology and archaeology          |
| <input type="checkbox"/>            | <input checked="" type="checkbox"/> Animals and other organisms |
| <input checked="" type="checkbox"/> | <input type="checkbox"/> Clinical data                          |
| <input checked="" type="checkbox"/> | <input type="checkbox"/> Dual use research of concern           |

### Methods

| n/a                                 | Included in the study                           |
|-------------------------------------|-------------------------------------------------|
| <input type="checkbox"/>            | <input checked="" type="checkbox"/> ChIP-seq    |
| <input checked="" type="checkbox"/> | <input type="checkbox"/> Flow cytometry         |
| <input checked="" type="checkbox"/> | <input type="checkbox"/> MRI-based neuroimaging |

## Antibodies

### Antibodies used

IMMUNOCYTOCHEMISTRY: goat anti-NANOG (R&D AF1997), 1:200; mouse anti-TRA1-60 (Millipore, MAB4360), 1:100; mouse anti-human NESTIN (Millipore, ABD69), goat anti-SOX2 (Santa Cruz sc-17320), 1:200; rabbit anti- $\beta$ -tubulin/Tuj 1 (Covance PRB-435P), 1:200; mouse anti-MAP2AB (Sigma M1406), 1:200. Secondary antibodies were Alexa donkey anti-rabbit 488 (Jackson Immuno 711-545-152) and 568 (Life Technologies A10042), Alexa donkey anti-mouse 488 (Jackson Immuno 715-545-151) and 568 anti-mouse (Life Technologies A10037), and Alexa donkey anti-goat 488 (Jackson Immuno 705-545-147) and 568 (Jackson Immuno 705-605-147); all were used at 1:300.

IMMUNOHISTOCHEMISTRY (IHC): anti-chicken GFP (Abcam, 1:5000; ab13970).

Antibodies used for immunoprecipitation were: mouse IgG (Santa Cruz cat. # sc-2025),  $\alpha$ -SMARCA4 (BRG1 H-10, mouse monoclonal, Santa Cruz cat. # sc-374197),  $\alpha$ -SS18L1 (CREST M-15, goat polyclonal, Santa Cruz cat. # sc-50912),  $\alpha$ -SS18L1#2 (CREST D-7, mouse monoclonal, Santa Cruz cat. # sc-515827),  $\alpha$ -SMARCC2 (BAF170 E-6, mouse monoclonal, Santa Cruz cat. # sc-17838),  $\alpha$ -SMARCB1 (INI1/BAF47 A-5, mouse monoclonal, Santa Cruz cat. # sc-166165),  $\alpha$ -SMARCD3 (BAF60C RN-18, mouse monoclonal, Santa Cruz cat. # sc-101163; this antibody did not appear to work for IP). For immunoblotting, additional antibodies were used:  $\alpha$ -HA (6E2, mouse monoclonal, Cell Signaling cat. # 2367; this antibody was by far the most clean of several  $\alpha$ -HA antibodies tested),  $\alpha$ -SMARCA2/4 (BRG1/BRM J1 clone, rabbit polyclonal, made in-house),  $\alpha$ -ACTL6B/BAF53B (rabbit polyclonal, made in-house),  $\alpha$ -TOP2B (F-12, rabbit polyclonal, Santa Cruz cat. # sc-365916),  $\alpha$ -ARID1B (mouse monoclonal, Novus Biologicals cat. # H00057492-M01),  $\alpha$ -PBRM1 (BAF180 D3F70, rabbit monoclonal, Cell Signaling cat. #91894),  $\alpha$ -TBP (mouse monoclonal, Abcam cat. # ab818),  $\alpha$ -B-ACTIN (AC-15, mouse monoclonal, Santa Cruz cat. #sc-69879). Goat or donkey,  $\alpha$ -mouse or  $\alpha$ -rabbit IRDye 800CW or 680LT (LI-COR) secondary antibodies were used for Western blot analysis

### Validation

Antibodies used in this study (all of which have been commercially validated by the manufacturers) were validated in human/rodent cells/tissues via immunoblotting, IPs or ICC/IHC/IF prior to experimentation (analyzed for correct migration size, sub-cellular localization patterns, etc.).

## Animals and other research organisms

Policy information about [studies involving animals](#); [ARRIVE guidelines](#) recommended for reporting animal research, and [Sex and Gender in Research](#)

### Laboratory animals

All mice used in DS related studies exist on a mixed genetic background, with comparative groups (euploid vs. Brwd1+/- vs. Ts65Dn vs. Ts65Dn;Brwd1+/-) maintained on the same mixed background (DBA/2J x B6EiC3Sn/J) for experimental testing. Briefly, trisomic Ts (176)65Dn (Ts65Dn) females (Jackson Labs Stock 001924) were crossed to B6EiC3Sn/J (Stock 001875) euploid males to generate euploid and Ts65Dn animal littermates for initial Brwd1 expression analyses. Brwd1repro5 mutant mice (Mouse Genome Informatics [MG] ID 3512929)14 were kindly provided by Dr. John Schimenti (Cornell). Heterozygotic Brwd1repro5 mutant male mice, aka Brwd1 +/- (fully backcrossed to B6EiC3Sn/J to match the breeding scheme for euploid vs. Ts65Dn animals), were crossed to Ts65Dn females to generate euploid vs. Brwd1+/- vs. Ts65Dn vs. Ts65Dn;Brwd1+/- animals for genetic rescue experiments. Given that suitable antibodies for the detection of endogenous Brwd1 in rodent tissues are not commercially available, we generated Brwd1FLAG-HA mice for in vivo interrogations.

Mice were group housed (separated by sex) – with the exception of surgicized animals, which were singly housed post-surgery –

under a 12-h-light/dark cycle at constant temperature (25°C) and humidity (40-60%) with ad libitum access to food and water. Animals arriving from external sources were allowed at least one week of habituation to housing conditions prior to experimentation. Both male and female mice were assessed in these studies E16 primary cultures/E17.5 (mixed male and female) and adult (6-week, males and females analyzed separately).

|                         |                                                                                                                                                                                                                                |
|-------------------------|--------------------------------------------------------------------------------------------------------------------------------------------------------------------------------------------------------------------------------|
| Wild animals            | The study did not involve samples collected from wild animals.                                                                                                                                                                 |
| Reporting on sex        | Both male and female mice were assessed in these studies [E16 primary cultures/E17.5 forebrain tissue (mixed male and female) and adult (6-week, males and females analyzed separately)].                                      |
| Field-collected samples | The study did not involve samples collected from the field.                                                                                                                                                                    |
| Ethics oversight        | All procedures were performed in accordance with NIH guidelines and the Institutional Animal Use and Care Committees (IACUC) at the Icahn School of Medicine at Mount Sinai, Michigan State University and Cornell University. |

Note that full information on the approval of the study protocol must also be provided in the manuscript.

## ChIP-seq

### Data deposition

- Confirm that both raw and final processed data have been deposited in a public database such as [GEO](#).
- Confirm that you have deposited or provided access to graph files (e.g. BED files) for the called peaks.

#### Data access links

*May remain private before publication.*

Data from RNA-seq, ChIP-seq and ATAC-seq experiments have been deposited in the National Center for Biotechnology Information Gene Expression Omnibus (GEO) database under accession numbers GSE210117 and GSE151255.

GEO Reviewer token:

GSE151255 (token = khadkasstvcvct)

GSE210117 (token = mzspsqmmjletdwh)

#### Files in database submission

Raw and processed files (including bigWig files) are included for each of the samples listed below:

E16\_FB-derived\_neuronal\_culture\_RNA-Seq\_Ts65Dn; Brwd1+/-\_1  
 E16\_FB-derived\_neuronal\_culture\_RNA-Seq\_Ts65Dn; Brwd1+/-\_2  
 E16\_FB-derived\_neuronal\_culture\_RNA-Seq\_Ts65Dn; Brwd1+/-\_3  
 E16\_FB-derived\_neuronal\_culture\_RNA-Seq\_Euploid\_1  
 E16\_FB-derived\_neuronal\_culture\_RNA-Seq\_Euploid\_2  
 E16\_FB-derived\_neuronal\_culture\_RNA-Seq\_Euploid\_3  
 E16\_FB-derived\_neuronal\_culture\_RNA-Seq\_Ts65Dn\_1  
 E16\_FB-derived\_neuronal\_culture\_RNA-Seq\_Ts65Dn\_2  
 E16\_FB-derived\_neuronal\_culture\_RNA-Seq\_Ts65Dn\_3

EU1\_10813\_4\_S16\_R1  
 EU1\_10813\_4\_S16\_R2  
 EU2\_10813\_5\_S17\_R1  
 EU2\_10813\_5\_S17\_R2  
 EU3\_10813\_6\_S18\_R1  
 EU3\_10813\_6\_S18\_R2  
 EU4\_10813\_8\_S19\_R1  
 EU4\_10813\_8\_S19\_R2  
 EU5\_10795\_1\_S20\_R1  
 EU5\_10795\_1\_S20\_R2  
 EU6\_10795\_2\_S21\_R1  
 EU6\_10795\_2\_S21\_R2  
 EU7\_10795\_4\_S23\_R1  
 EU7\_10795\_4\_S23\_R2  
 EU8\_10795\_7\_S25\_R1  
 EU8\_10795\_7\_S25\_R2  
 TS1\_10813\_1\_S13\_R1  
 TS1\_10813\_1\_S13\_R2  
 TS2\_10813\_2\_S14\_R1  
 TS2\_10813\_2\_S14\_R2  
 TS3\_10813\_3\_S15\_R1  
 TS3\_10813\_3\_S15\_R2  
 TS4\_10795\_3\_S22\_R1  
 TS4\_10795\_3\_S22\_R2  
 TS5\_10795\_6\_S24\_R1  
 TS5\_10795\_6\_S24\_R2

TS6\_10795\_10\_S26\_R1  
 TS6\_10795\_10\_S26\_R2  
 TS7\_10795\_11\_S27\_R1  
 TS7\_10795\_11\_S27\_R2

Galaxy146-[F\_CR\_\_F\_CR\_B113]  
 Galaxy146-[F\_CR\_\_F\_CR\_B133]  
 Galaxy146-[F\_CR\_\_F\_CR\_B136]  
 Galaxy146-[F\_CR\_\_F\_CR\_B166]  
 Galaxy146-[F\_CR\_\_F\_CR\_B167]  
 Galaxy146-[F\_CR\_\_F\_CR\_B175]  
 Galaxy146-[F\_CR\_\_F\_CR\_B176]  
 Galaxy146-[F\_CR\_\_F\_CR\_B181]  
 Galaxy150-[M\_TS\_\_M\_TS\_B145]  
 Galaxy150-[M\_TS\_\_M\_TS\_B25]  
 Galaxy150-[M\_TS\_\_M\_TS\_B40]  
 Galaxy150-[M\_TS\_\_M\_TS\_B45]  
 Galaxy150-[M\_TS\_\_M\_TS\_B52]  
 Galaxy150-[M\_TS\_\_M\_TS\_B74]  
 Galaxy150-[M\_TS\_\_M\_TS\_B88]  
 Galaxy170-[M\_WT\_\_M\_WT\_B100]  
 Galaxy170-[M\_WT\_\_M\_WT\_B110]  
 Galaxy170-[M\_WT\_\_M\_WT\_B122]  
 Galaxy170-[M\_WT\_\_M\_WT\_B139]  
 Galaxy170-[M\_WT\_\_M\_WT\_B79]  
 Galaxy170-[M\_WT\_\_M\_WT\_B80]  
 Galaxy170-[M\_WT\_\_M\_WT\_B84]  
 Galaxy170-[M\_WT\_\_M\_WT\_B95]  
 Galaxy179-[F\_WT\_\_F\_WT\_B12]  
 Galaxy179-[F\_WT\_\_F\_WT\_B125]  
 Galaxy179-[F\_WT\_\_F\_WT\_B17]  
 Galaxy179-[F\_WT\_\_F\_WT\_B173]  
 Galaxy179-[F\_WT\_\_F\_WT\_B184]  
 Galaxy179-[F\_WT\_\_F\_WT\_B21]  
 Galaxy179-[F\_WT\_\_F\_WT\_B85]  
 Galaxy179-[F\_WT\_\_F\_WT\_B65]  
 Galaxy204-[F\_TS\_\_F\_TS\_B103]  
 Galaxy204-[F\_TS\_\_F\_TS\_B134]  
 Galaxy204-[F\_TS\_\_F\_TS\_B135]  
 Galaxy204-[F\_TS\_\_F\_TS\_B53]  
 Galaxy204-[F\_TS\_\_F\_TS\_B56]  
 Galaxy204-[F\_TS\_\_F\_TS\_T139]  
 Galaxy204-[F\_TS\_\_F\_TS\_T141]  
 Galaxy204-[F\_TS\_\_F\_TS\_T142]  
 Galaxy376-[M\_CR\_\_M\_CR\_B137]  
 Galaxy376-[M\_CR\_\_M\_CR\_B138]  
 Galaxy376-[M\_CR\_\_M\_CR\_B24]  
 Galaxy376-[M\_CR\_\_M\_CR\_B26]  
 Galaxy376-[M\_CR\_\_M\_CR\_B51]  
 Galaxy376-[M\_CR\_\_M\_CR\_B69]  
 Galaxy376-[M\_CR\_\_M\_CR\_B94]  
 Galaxy376-[M\_CR\_\_M\_CR\_T35]

Adult\_Hippocampus\_Male\_Smarca2/4 ChIP-Seq\_Euploid\_IP\_1  
 Adult\_Hippocampus\_Male\_Smarca2/4 ChIP-Seq\_Euploid\_IP\_2  
 Adult\_Hippocampus\_Male\_Smarca2/4 ChIP-Seq\_Euploid\_IP\_3  
 Adult\_Hippocampus\_Male\_Smarca2/4 ChIP-Seq\_Ts65Dn\_IP\_1  
 Adult\_Hippocampus\_Male\_Smarca2/4 ChIP-Seq\_Ts65Dn\_IP\_2  
 Adult\_Hippocampus\_Male\_Smarca2/4 ChIP-Seq\_Ts65Dn\_IP\_3  
 Adult\_Hippocampus\_Male\_Smarca2/4 ChIP-Seq\_Ts65Dn\_IP\_4  
 Adult\_Hippocampus\_Male\_Smarca2/4 ChIP-Seq\_Ts65Dn; Brwd1+/-\_IP\_1  
 Adult\_Hippocampus\_Male\_Smarca2/4 ChIP-Seq\_Ts65Dn; Brwd1+/-\_IP\_2  
 Adult\_Hippocampus\_Male\_Smarca2/4 ChIP-Seq\_Ts65Dn; Brwd1+/-\_IP\_3  
 Adult\_Hippocampus\_Male\_Smarca2/4 ChIP-Seq\_Ts65Dn; Brwd1+/-\_IP\_4  
 Adult\_Hippocampus\_Male\_Smarca2/4 ChIP-Seq\_Euploid\_IP\_4  
 Adult\_Hippocampus\_Male\_Smarca2/4 ChIP-Seq\_Euploid\_Input\_1  
 Adult\_Hippocampus\_Male\_Smarca2/4 ChIP-Seq\_Euploid\_Input\_2

Adult\_Hippocampus\_Male\_Smarca2/4 ChIP-Seq\_Euploid\_Input\_3  
 Adult\_Hippocampus\_Male\_Smarca2/4 ChIP-Seq\_Ts65Dn\_Input\_1  
 Adult\_Hippocampus\_Male\_Smarca2/4 ChIP-Seq\_Ts65Dn\_Input\_2  
 Adult\_Hippocampus\_Male\_Smarca2/4 ChIP-Seq\_Ts65Dn\_Input\_3  
 Adult\_Hippocampus\_Male\_Smarca2/4 ChIP-Seq\_Ts65Dn\_Input\_4  
 Adult\_Hippocampus\_Male\_Smarca2/4 ChIP-Seq\_Ts65Dn; Brwd1+/-\_Input\_1  
 Adult\_Hippocampus\_Male\_Smarca2/4 ChIP-Seq\_Ts65Dn; Brwd1+/-\_Input\_2  
 Adult\_Hippocampus\_Male\_Smarca2/4 ChIP-Seq\_Ts65Dn; Brwd1+/-\_Input\_3  
 Adult\_Hippocampus\_Male\_Smarca2/4 ChIP-Seq\_Ts65Dn; Brwd1+/-\_Input\_4  
 Adult\_Hippocampus\_Male\_Smarca2/4 ChIP-Seq\_Euploid\_Input\_4  
 Adult\_Hippocampus\_Male\_Neuronal ATAC-Seq\_Ts65Dn; Brwd1+/-\_1  
 Adult\_Hippocampus\_Male\_Neuronal ATAC-Seq\_Ts65Dn; Brwd1+/-\_2  
 Adult\_Hippocampus\_Male\_Neuronal ATAC-Seq\_Ts65Dn; Brwd1+/-\_3  
 Adult\_Hippocampus\_Male\_Neuronal ATAC-Seq\_Ts65Dn\_1  
 Adult\_Hippocampus\_Male\_Neuronal ATAC-Seq\_Ts65Dn\_2  
 Adult\_Hippocampus\_Male\_Neuronal ATAC-Seq\_Ts65Dn\_3  
 Adult\_Hippocampus\_Male\_Neuronal ATAC-Seq\_Euploid\_1  
 Adult\_Hippocampus\_Male\_Neuronal ATAC-Seq\_Euploid\_2  
 Adult\_Hippocampus\_Male\_Neuronal ATAC-Seq\_Euploid\_3

Genome browser session  
 (e.g. [UCSC](#))

[https://ramaka02.u.hpc.mssm.edu/Brg1\\_ChIPseq/](https://ramaka02.u.hpc.mssm.edu/Brg1_ChIPseq/)  
[https://ramaka02.u.hpc.mssm.edu/Brg1\\_ATACseq/](https://ramaka02.u.hpc.mssm.edu/Brg1_ATACseq/)

## Methodology

|                         |                                                                                                                                                                                                                                                                                                                                                                                                      |
|-------------------------|------------------------------------------------------------------------------------------------------------------------------------------------------------------------------------------------------------------------------------------------------------------------------------------------------------------------------------------------------------------------------------------------------|
| Replicates              | For RNA-seq experiments in brain tissue, a n=7-8 biological replicates/group were used, with n=3/group used for E16 primary neuronal cultures. For all ChIP-seq and ATAC-seq experiments, a n=3-4 biological replicates were used in each group.                                                                                                                                                     |
| Sequencing depth        | Average sequencing depth for RNA-seq experiments: 20M reads<br>Average sequencing depth for ChIP-seq experiments: 60M reads<br>Average sequencing depth for ATAC-seq experiments: 80M reads                                                                                                                                                                                                          |
| Antibodies              | Samples were then incubated with a custom anti-SMARCA2/4 antibody provided by the Crabtree lab (Reference #39).                                                                                                                                                                                                                                                                                      |
| Peak calling parameters | Peak-calling was performed using MACSv2.1.124 with default settings.                                                                                                                                                                                                                                                                                                                                 |
| Data quality            | Peaks were filtered for FDR < 0.05 and fold change > 1.2. All processed peak data, along with respective fold changes and FDR values, are provided in the Extended Data Tables as part of this initial submission.                                                                                                                                                                                   |
| Software                | HISAT2<br>MACSv2.1.124<br>diffReps<br><br>ATAC-seq differential lists were compared to ChIP-seq differential lists based on gene names using geneOverlap (GeneOverlap: Test and visualize gene overlaps. R package version 1.23.0, <a href="http://shenlab-sinai.github.io/shenlab-sinai/">http://shenlab-sinai.github.io/shenlab-sinai/</a> ), and heat maps were drawn using the deepTools package |
